# Supplementary material for: Synthesis and NMDA receptor affinity of dexoxadrol analogues with modifications in position 4 of the piperidine ring
Source: Royal Society of Chemistry journal article supplement (doi:10.1039/c0md00017e), 2010-01-01
Supplement: c0md00017e.pdf [file c0md00017e.pdf]

# HPLC

## Comp12

Analyzed: 18.02.09 22:43

Reported: 19.02.09 09:57  
Processed: 19.02.09 09:57

Data Path: D:\WIN32APP\HSM\Christoph\DATA\2039\

Application: Christoph

**Sample Name: ABN360**

Injection from this vial: 1 of 1

Series:2039

Vial Number: 5

Vial Type: UNK

Volume: 5,0 ul

Chrom Type: HPLC Channel : 1

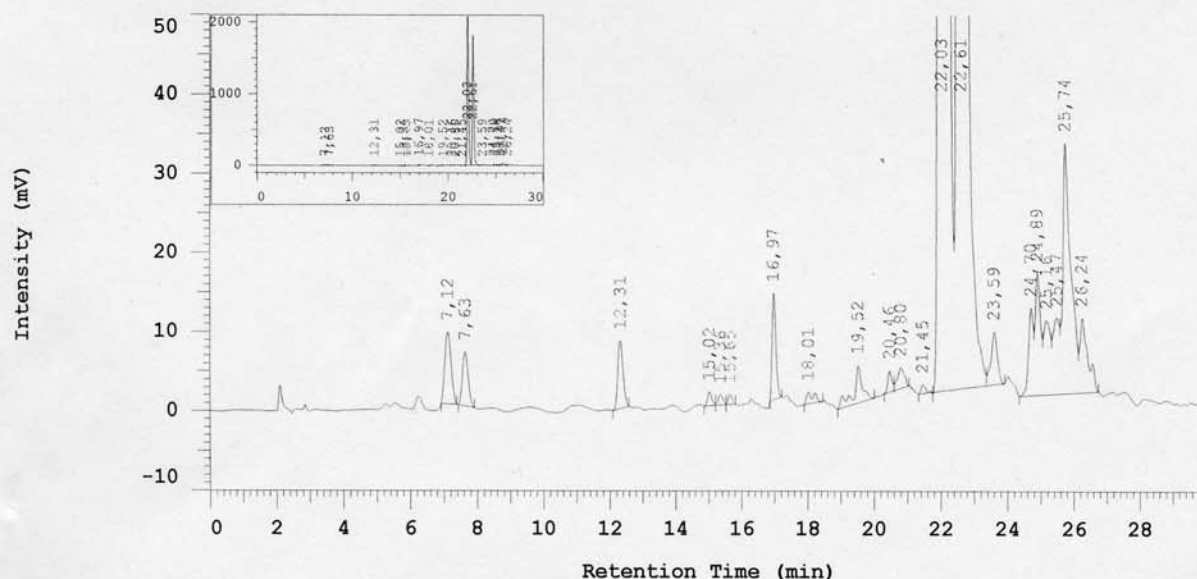

Acquisition Method: Chromni

Blank Subtr Sample Name: ACN

Column Type: 010

Solvent A: Wasser + 0,05%TFA

Developed by: Jens

Solvent B: ACN + 0,05%TFA

| No. | RT    | Area     | Conc 1  | BC |
|-----|-------|----------|---------|----|
| 1   | 7,12  | 115809   | 0,284   | MC |
| 2   | 7,63  | 79175    | 0,194   | MC |
| 3   | 12,31 | 92472    | 0,227   | BB |
| 4   | 15,02 | 15164    | 0,037   | MC |
| 5   | 15,36 | 12674    | 0,031   | MC |
| 6   | 15,65 | 10203    | 0,025   | MC |
| 7   | 16,97 | 105594   | 0,259   | MC |
| 8   | 18,01 | 19664    | 0,048   | BB |
| 9   | 19,52 | 81462    | 0,200   | BB |
| 10  | 20,46 | 22265    | 0,055   | BB |
| 11  | 20,80 | 37881    | 0,093   | BB |
| 12  | 21,45 | 9751     | 0,024   | MC |
| 13  | 22,03 | 21631801 | 53,084  | MC |
| 14  | 22,61 | 17192544 | 42,190  | MC |
| 15  | 23,59 | 89076    | 0,219   | MC |
| 16  | 24,70 | 106664   | 0,262   | BV |
| 17  | 24,89 | 170862   | 0,419   | VV |
| 18  | 25,16 | 132802   | 0,326   | VV |
| 19  | 25,47 | 130594   | 0,320   | VV |
| 20  | 25,74 | 535696   | 1,315   | VV |
| 21  | 26,24 | 157677   | 0,387   | VB |
|     |       | 40749830 | 100,000 |    |

# HPLC

Analyzed: 21.01.09 20:26

**Comp13a**

Reported: 22.01.09 10:26  
Processed: 22.01.09 10:26

Data Path: D:\WIN32APP\HSM\Christoph\DATA\1948\

Application: Christoph

**Sample Name: ABN343A**

Series:1948

Vial Number: 2

Injection from this vial: 1 of 1

Vial Type: UNK

Volume: 5,0 ul

Chrom Type: HPLC Channel : 1

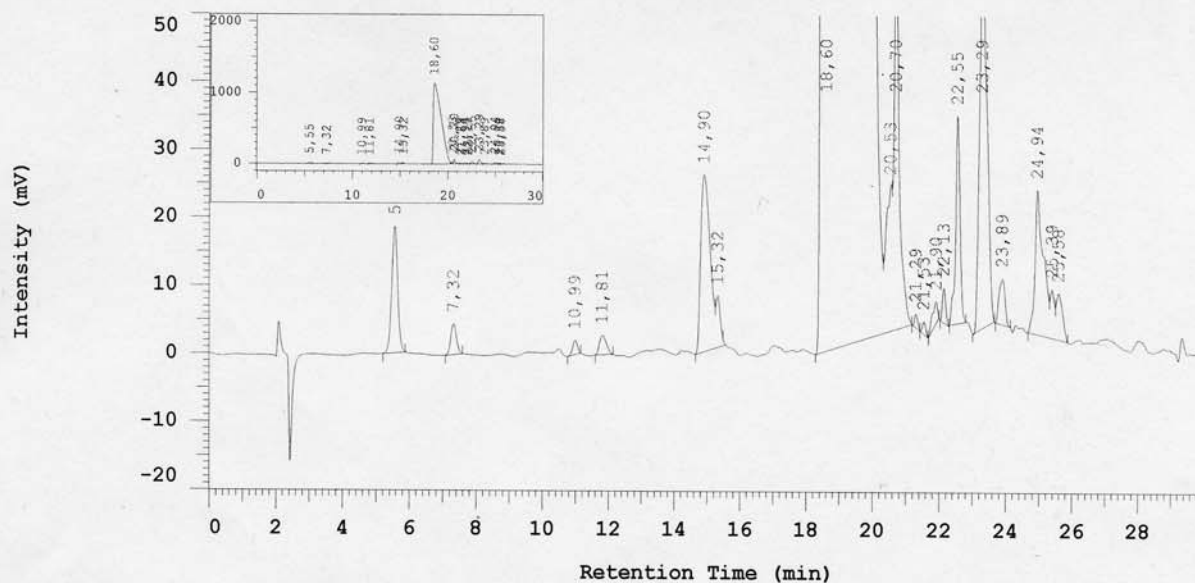

Acquisition Method: Chromni

Blank Subtr Sample Name: ACN

Column Type: 010

Developed by: Jens

Solvent A: Wasser + 0,05%TFA

Solvent B: ACN + 0,05%TFA

| No. | RT    | Area     | Conc 1 | BC |
|-----|-------|----------|--------|----|
| 1   | 5,55  | 222002   | 0,332  | MC |
| 2   | 7,32  | 52260    | 0,078  | MC |
| 3   | 10,99 | 20609    | 0,031  | BB |
| 4   | 11,81 | 41891    | 0,063  | MC |
| 5   | 14,90 | 505764   | 0,757  | BV |
| 6   | 15,32 | 72001    | 0,108  | MC |
| 7   | 18,60 | 63179475 | 94,529 | MC |
| 8   | 20,53 | 273530   | 0,409  | MC |
| 9   | 20,70 | 645272   | 0,965  | MC |
| 10  | 21,29 | 12877    | 0,019  | MC |
| 11  | 21,53 | 12653    | 0,019  | MC |
| 12  | 21,90 | 34337    | 0,051  | MC |
| 13  | 22,13 | 34819    | 0,052  | MC |
| 14  | 22,55 | 274096   | 0,410  | MC |
| 15  | 23,29 | 848920   | 1,270  | MC |
| 16  | 23,89 | 82636    | 0,124  | MC |
| 17  | 24,94 | 366723   | 0,549  | MC |
| 18  | 25,39 | 64863    | 0,097  | MC |
| 19  | 25,58 | 91033    | 0,136  | MC |

66835761

100,000

Peak rejection level: 0

HPLC  
Comp13c

Analyzed: 21.01.09 21:07

Reported: 22.01.09 09:39  
Processed: 22.01.09 09:38

Data Path: D:\WIN32APP\HSM\Christoph\DATA\1949\

Application: Christoph

Sample Name: ABN343B

Series:1949

Vial Number: 3

Injection from this vial: 1 of 1

Vial Type: UNK

Volume: 5,0 ul

Chrom Type: HPLC Channel : 1

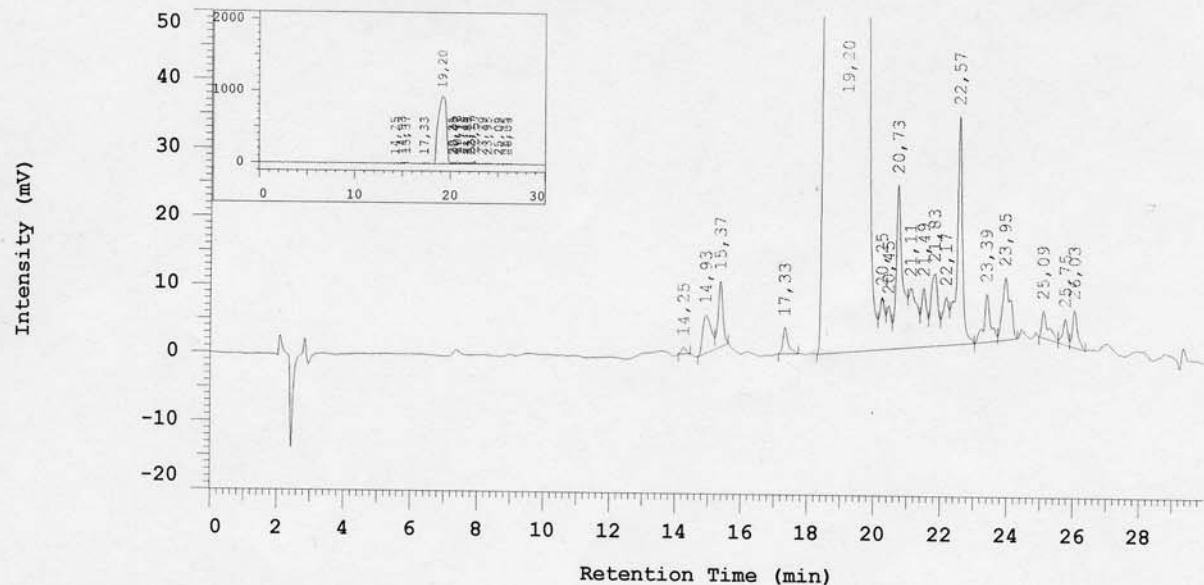

Acquisition Method: Chromni

Blank Subtr Sample Name: ACN

Column Type: 010

Solvent A: Wasser + 0,05%TFA

Developed by: Jens

Solvent B: ACN + 0,05%TFA

| No. | RT    | Area     | Conc 1  | BC |
|-----|-------|----------|---------|----|
| 1   | 14,25 | 8992     | 0,016   | BB |
| 2   | 14,93 | 95903    | 0,172   | BV |
| 3   | 15,37 | 97381    | 0,175   | VB |
| 4   | 17,33 | 41601    | 0,075   | MC |
| 5   | 19,20 | 53673612 | 96,407  | BV |
| 6   | 20,25 | 87392    | 0,157   | MC |
| 7   | 20,45 | 64604    | 0,116   | MC |
| 8   | 20,73 | 316401   | 0,568   | MC |
| 9   | 21,11 | 157271   | 0,282   | MC |
| 10  | 21,49 | 99751    | 0,179   | MC |
| 11  | 21,83 | 161742   | 0,291   | MC |
| 12  | 22,17 | 89082    | 0,160   | MC |
| 13  | 22,57 | 379117   | 0,681   | MC |
| 14  | 23,39 | 99581    | 0,179   | BB |
| 15  | 23,95 | 152215   | 0,273   | BB |
| 16  | 25,09 | 54309    | 0,098   | BB |
| 17  | 25,75 | 37266    | 0,067   | BB |
| 18  | 26,03 | 57621    | 0,103   | BB |
|     |       | 55673841 | 100,000 |    |

Peak rejection level: 0

HPLC  
Comp15a

Analyzed: 18.02.09 22:02

Reported: 19.02.09 09:55  
Processed: 19.02.09 09:55

Data Path: D:\WIN32APP\HSM\Christoph\DATA\2038\

Application: Christoph

Sample Name: ABN359

Injection from this vial: 1 of 1

Series:2038

Vial Number: 4

Vial Type: UNK

Volume: 5,0 ul

Chrom Type: HPLC Channel : 1

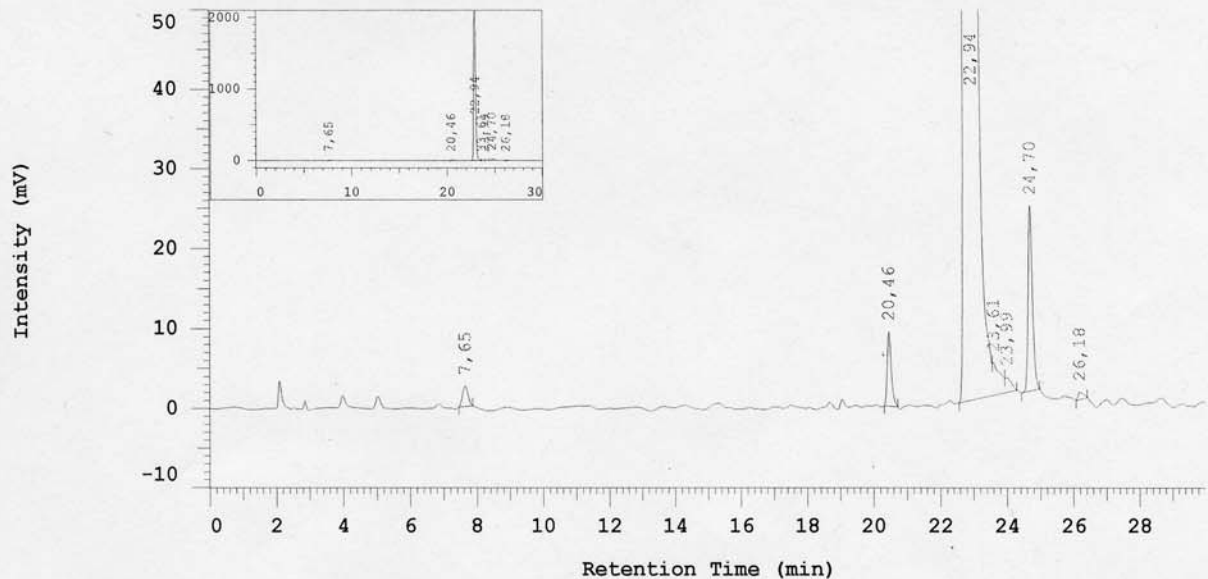

Acquisition Method: Chromni

Blank Subtr Sample Name: ACN

Column Type: 010

Solvent A: Wasser + 0,05%TFA

Developed by: Jens

Solvent B: ACN + 0,05%TFA

| No. | RT    | Area     | Conc 1  | BC |
|-----|-------|----------|---------|----|
| 1   | 7,65  | 29247    | 0,101   | MC |
| 2   | 20,46 | 77622    | 0,268   | MC |
| 3   | 22,94 | 28545011 | 98,571  | MC |
| 4   | 23,61 | 66603    | 0,230   | MC |
| 5   | 23,99 | 23908    | 0,083   | MC |
| 6   | 24,70 | 206393   | 0,713   | BB |
| 7   | 26,18 | 10141    | 0,035   | BB |
|     |       | 28958925 | 100,000 |    |

Peak rejection level: 0

# HPLC Comp15c

Analyzed: 19.02.09 02:11

Reported: 19.02.09 10:23  
Processed: 19.02.09 10:23

Data Path: D:\WIN32APP\HSM\Christoph\DATA\2044\

Application: Christoph

Series:2044

**Sample Name: ABN365**

Vial Number: 9

Injection from this vial: 1 of 1

Vial Type: UNK

Volume: 5,0 ul

Chrom Type: HPLC Channel : 1

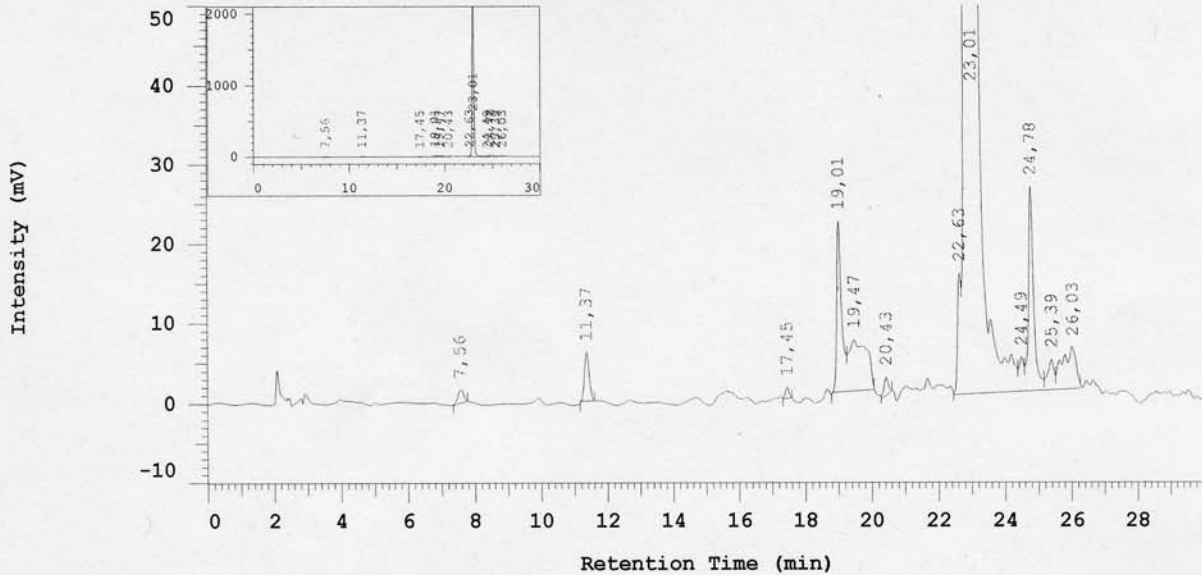

Acquisition Method: Chromni

Blank Subtr Sample Name: ACN

Column Type: 010

Developed by: Jens

Solvent A: Wasser + 0,05%TFA

Solvent B: ACN + 0,05%TFA

| No. | RT    | Area     | Conc 1  | BC |
|-----|-------|----------|---------|----|
| 1   | 7,56  | 18893    | 0,072   | MC |
| 2   | 11,37 | 58846    | 0,224   | BB |
| 3   | 17,45 | 10089    | 0,038   | BB |
| 4   | 19,01 | 215426   | 0,821   | MC |
| 5   | 19,47 | 238688   | 0,910   | MC |
| 6   | 20,43 | 19877    | 0,076   | BB |
| 7   | 22,63 | 110558   | 0,421   | MC |
| 8   | 23,01 | 25046489 | 95,466  | MC |
| 9   | 24,49 | 42153    | 0,161   | MC |
| 10  | 24,78 | 275118   | 1,049   | MC |
| 11  | 25,39 | 50511    | 0,193   | MC |
| 12  | 26,03 | 149382   | 0,569   | MC |
|     |       | 26236030 | 100,000 |    |

Peak rejection level: 0

# HPLC Comp16a

Analyzed: 19.02.09 00:06

Reported: 19.02.09 10:00  
Processed: 19.02.09 10:00

Data Path: D:\WIN32APP\HSM\Christoph\DATA\2041\

Application: Christoph

Sample Name: ABN362A

Injection from this vial: 1 of 1

Series:2041

Vial Number: 7

Vial Type: UNK

Volume: 5,0 ul

Chrom Type: HPLC Channel : 1

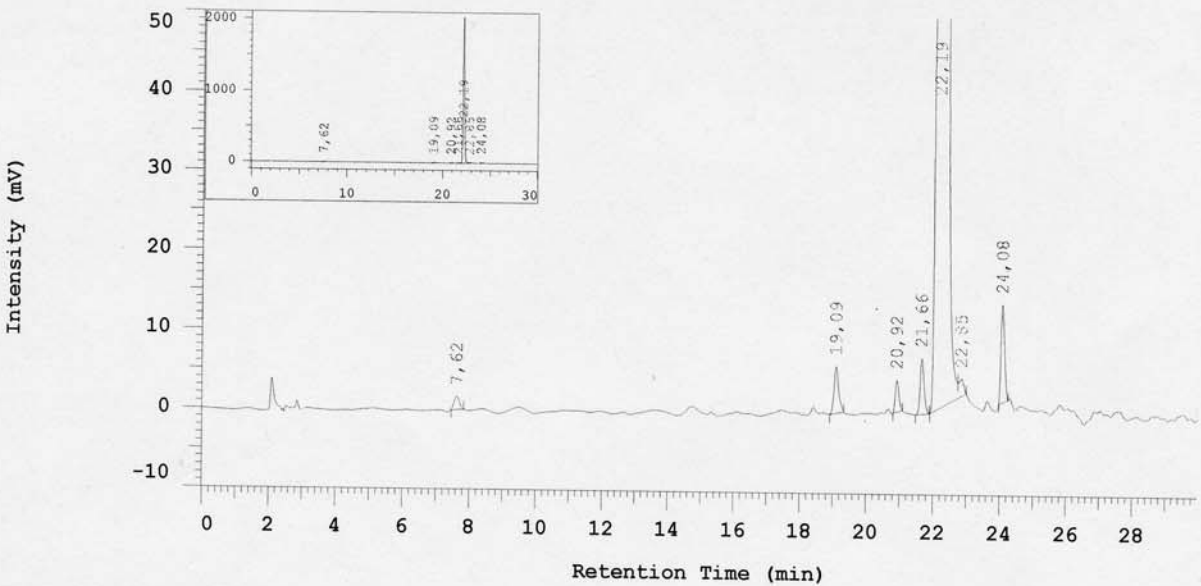

Acquisition Method: Chromni

Blank Subtr Sample Name: ACN

Column Type: 010

Solvent A: Wasser + 0,05%TFA

Developed by: Jens

Solvent B: ACN + 0,05%TFA

| No. | RT    | Area     | Conc 1  | BC |
|-----|-------|----------|---------|----|
| 1   | 7,62  | 17957    | 0,090   | MC |
| 2   | 19,09 | 54937    | 0,276   | BB |
| 3   | 20,92 | 29343    | 0,148   | MC |
| 4   | 21,66 | 56234    | 0,283   | BB |
| 5   | 22,19 | 19615564 | 98,642  | BV |
| 6   | 22,85 | 21434    | 0,108   | MC |
| 7   | 24,08 | 90155    | 0,453   | MC |
|     |       | 19885624 | 100,000 |    |

Peak rejection level: 0



# HPLC

## Comp16b

Analyzed: 19.02.09 01:29

Reported: 19.02.09 10:03  
Processed: 19.02.09 10:03

Data Path: D:\WIN32APP\HSM\Christoph\DATA\2043\

Application: Christoph

Series:2043

**Sample Name: ABN362B**

Vial Number: 8

Injection from this vial: 1 of 1

Vial Type: UNK

Volume: 5,0 ul

Chrom Type: HPLC Channel : 1

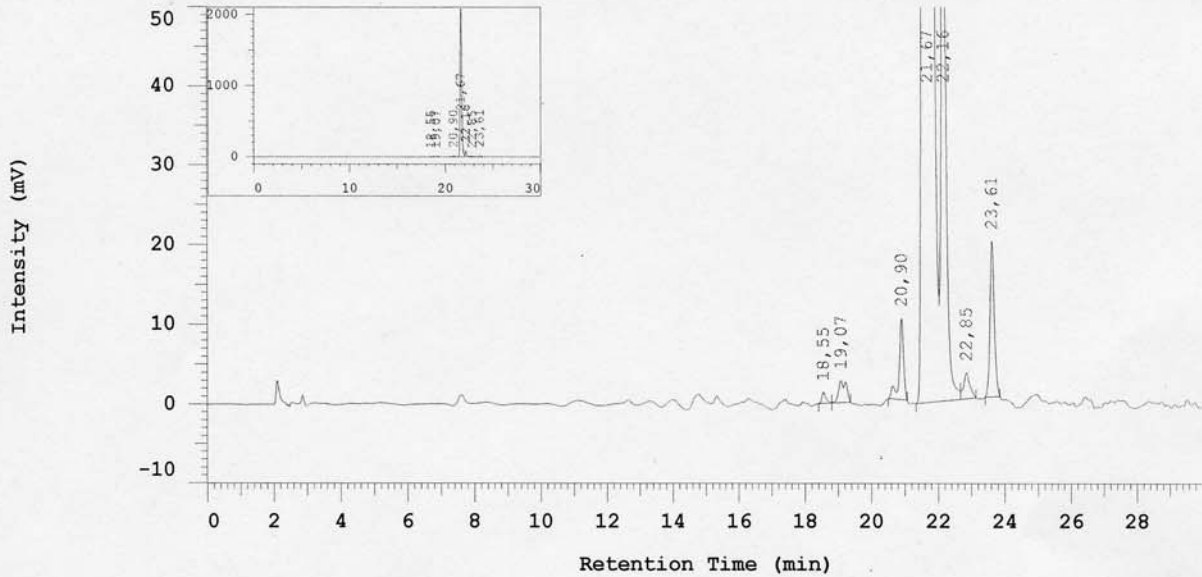

Acquisition Method: Chromni

Blank Subtr Sample Name: ACN

Column Type: 010

Solvent A: Wasser + 0,05%TFA

Developed by: Jens

Solvent B: ACN + 0,05%TFA

| No. | RT    | Area     | Conc 1  | BC |
|-----|-------|----------|---------|----|
| 1   | 18,55 | 12020    | 0,051   | MC |
| 2   | 19,07 | 44337    | 0,190   | MC |
| 3   | 20,90 | 94887    | 0,406   | MC |
| 4   | 21,67 | 22186160 | 95,014  | MC |
| 5   | 22,16 | 800018   | 3,426   | MC |
| 6   | 22,85 | 42206    | 0,181   | MC |
| 7   | 23,61 | 170795   | 0,731   | MC |
|     |       | 23350423 | 100,000 |    |

Peak rejection level: 0

HPLC  
Comp16c

Analyzed: 25.02.09 21:47

Reported: 26.02.09 09:43  
Processed: 26.02.09 09:43

Data Path: D:\WIN32APP\HSM\Christoph\DATA\2060\

Application: Christoph

Sample Name: ABN368A

Injection from this vial: 1 of 1

Series:2060

Vial Number: 3

Vial Type: UNK

Volume: 5,0 ul

Chrom Type: HPLC Channel : 1

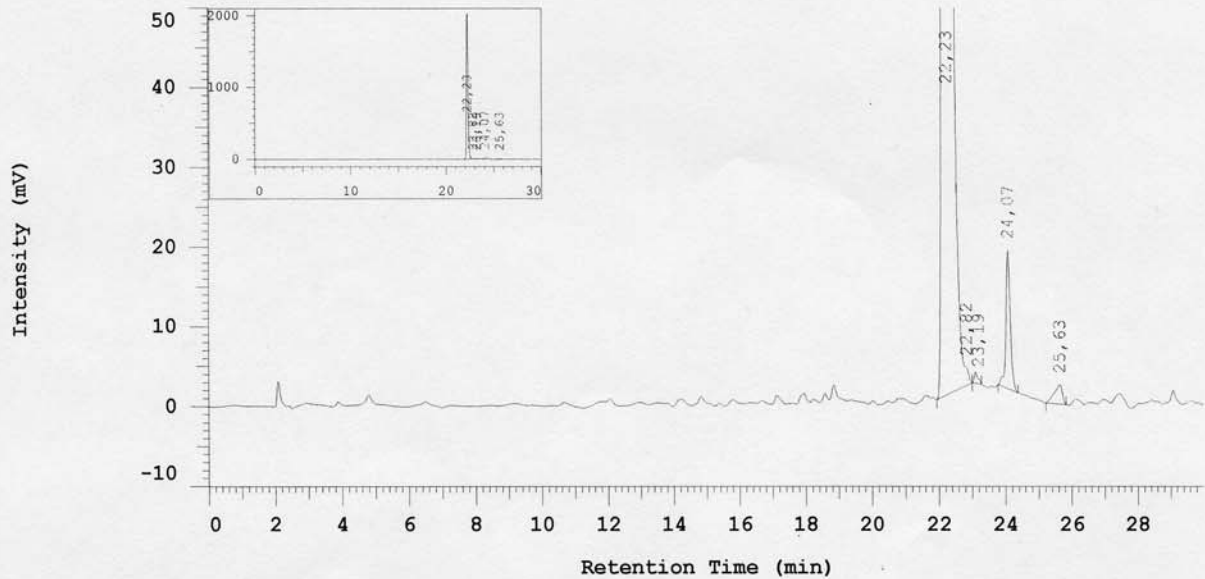

Acquisition Method: Chromni

Blank Subtr Sample Name: ACN

Column Type: 010

Solvent A: Wasser + 0,05%TFA

Developed by: Jens

Solvent B: ACN + 0,05%TFA

| No. | RT    | Area     | Conc 1  | BC |
|-----|-------|----------|---------|----|
| 1   | 22,23 | 19302174 | 98,126  | MC |
| 2   | 22,82 | 161786   | 0,822   | MC |
| 3   | 23,19 | 10380    | 0,053   | MC |
| 4   | 24,07 | 155474   | 0,790   | BB |
| 5   | 25,63 | 40918    | 0,208   | MC |
|     |       | 19670732 | 100,000 |    |

Peak rejection level: 0



# HPLC Comp16d

Analyzed: 25.02.09 22:28

Reported: 26.02.09 09:49  
Processed: 26.02.09 09:49

Data Path: D:\WIN32APP\HSM\Christoph\DATA\2061\

Application: Christoph

Sample Name: ABN368B

Injection from this vial: 1 of 1

Series:2061

Vial Number: 4

Vial Type: UNK

Volume: 5,0 ul

Chrom Type: HPLC Channel : 1

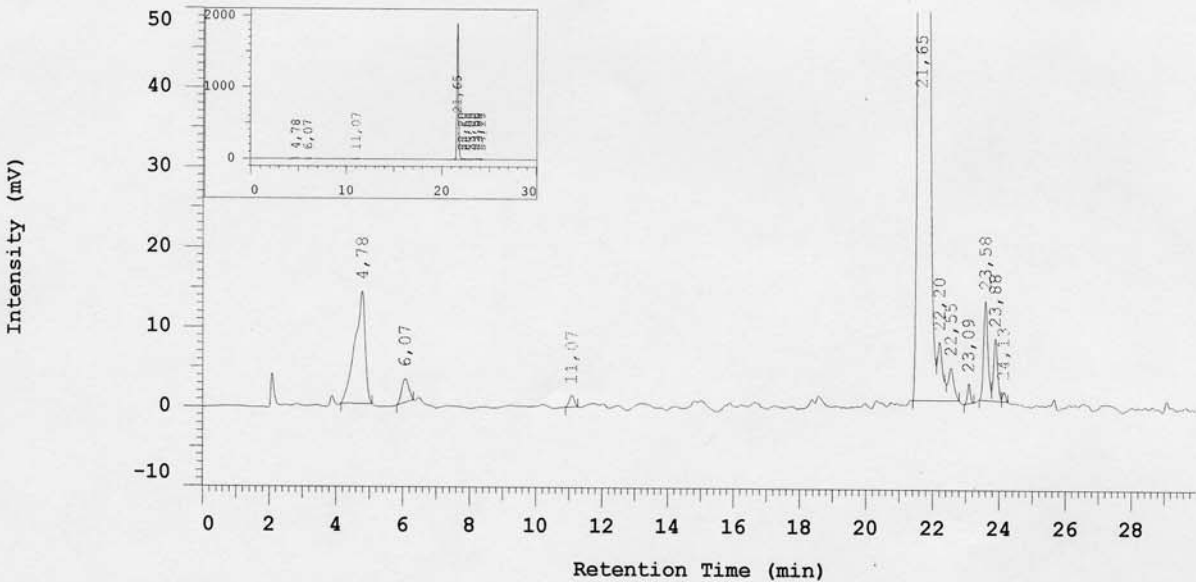

Acquisition Method: Chromni

Blank Subtr Sample Name: ACN

Column Type: 010

Solvent A: Wasser + 0,05%TFA

Developed by: Jens

Solvent B: ACN + 0,05%TFA

| No. | RT    | Area     | Conc 1  | BC |
|-----|-------|----------|---------|----|
| 1   | 4,78  | 298784   | 1,593   | MC |
| 2   | 6,07  | 41986    | 0,224   | MC |
| 3   | 11,07 | 14559    | 0,078   | MC |
| 4   | 21,65 | 18077286 | 96,377  | MC |
| 5   | 22,20 | 77674    | 0,414   | MC |
| 6   | 22,55 | 49441    | 0,264   | MC |
| 7   | 23,09 | 14126    | 0,075   | MC |
| 8   | 23,58 | 110054   | 0,587   | MC |
| 9   | 23,88 | 65154    | 0,347   | MC |
| 10  | 24,13 | 7860     | 0,042   | MC |
|     |       | 18756924 | 100,000 |    |

Peak rejection level: 0

# HPLC

## Comp17a

Analyzed: 29.04.08 20:56

Reported: 30.04.08 08:48  
Processed: 30.04.08 08:47

Data Path: D:\WIN32APP\HSM\Christoph\DATA\1231\

Application: Christoph

Sample Name: ABN 148R

Injection from this vial: 1 of 1

Series:1231  
Vial Number: 5  
Vial Type: UNK  
Volume: 5,0 ul

Chrom Type: HPLC Channel : 1

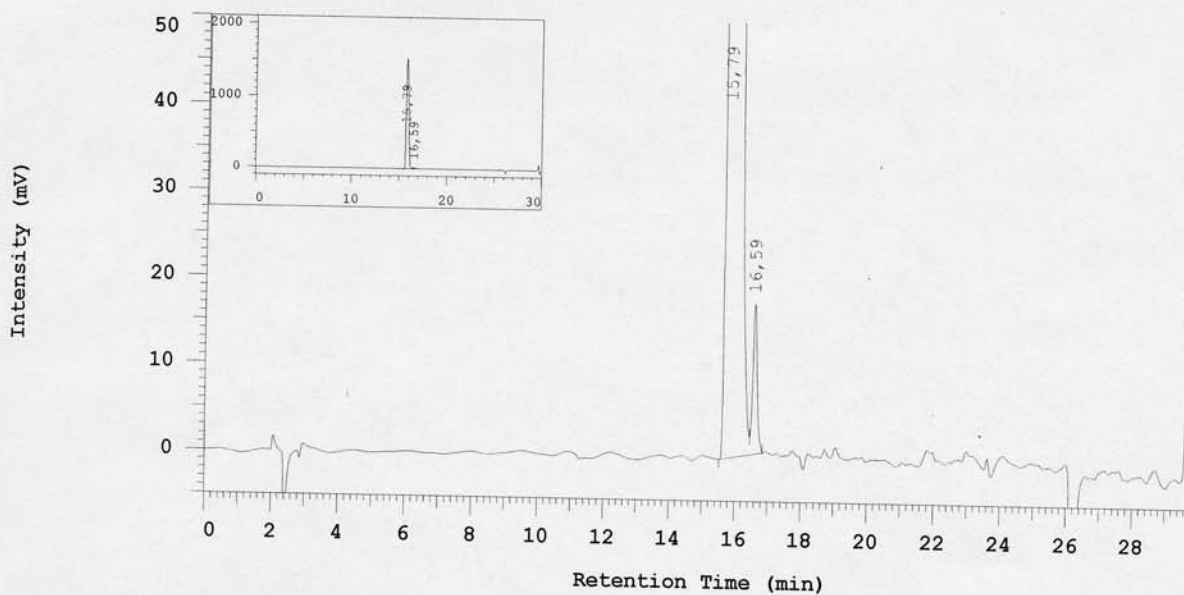

Acquisition Method: Chromni

Blank Subtr Sample Name: ACN

Column Type: 010

Solvent A: Wasser + 0,05%TFA

Developed by: Jens

Solvent B: ACN + 0,05%TFA

| No. | RT    | Area     | Conc 1  | BC |
|-----|-------|----------|---------|----|
| 1   | 15,79 | 24904990 | 99,379  | BV |
| 2   | 16,59 | 155516   | 0,621   | MC |
|     |       | 25060506 | 100,000 |    |

Peak rejection level: 0

# HPLC

## Comp17b

Analyzed: 12.03.08 22:22

Reported: 13.03.08 09:58  
Processed: 13.03.08 09:58

Data Path: D:\WIN32APP\HSM\Christoph\DATA\1084\  
Application: Christoph

**Sample Name: ABN149**

Injection from this vial: 1 of 1

Series:1084  
Vial Number: 5  
Vial Type: UNK  
Volume: 5,0 ul

Chrom Type: HPLC Channel : 1

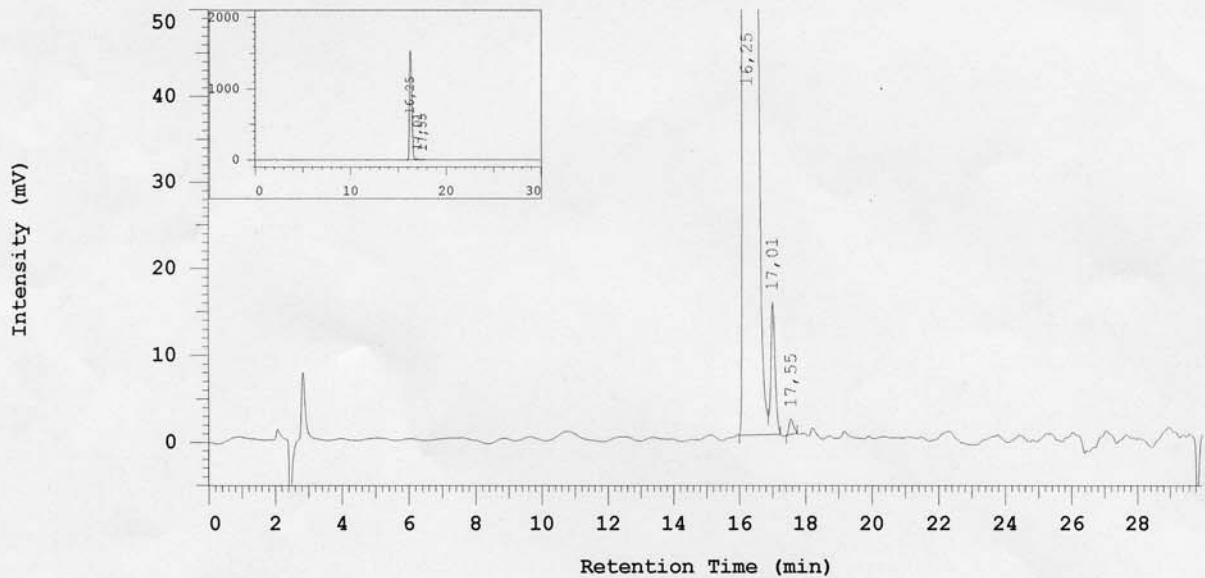

**Acquisition Method: Chromni**

Blank Subtr Sample Name: ACN

Column Type: 010

Solvent A: Wasser + 0,05%TFA

Developed by: Jens

Solvent B: ACN + 0,05%TFA

| No. | RT    | Area     | Conc 1  | BC |
|-----|-------|----------|---------|----|
| 1   | 16,25 | 23863116 | 99,371  | MC |
| 2   | 17,01 | 134781   | 0,561   | MC |
| 3   | 17,55 | 16298    | 0,068   | MC |
|     |       | 24014195 | 100,000 |    |

Peak rejection level: 0

# HPLC Comp17c

Analyzed: 19.03.08 19:43

Reported: 20.03.08 10:47  
Processed: 20.03.08 10:47

Data Path: D:\WIN32APP\HSM\Christoph\DATA\1101\

Application: Christoph

**Sample Name: ABN150**

Injection from this vial: 1 of 1

Series:1101

Vial Number: 2

Vial Type: UNK

Volume: 5,0 ul

Chrom Type: HPLC Channel : 1

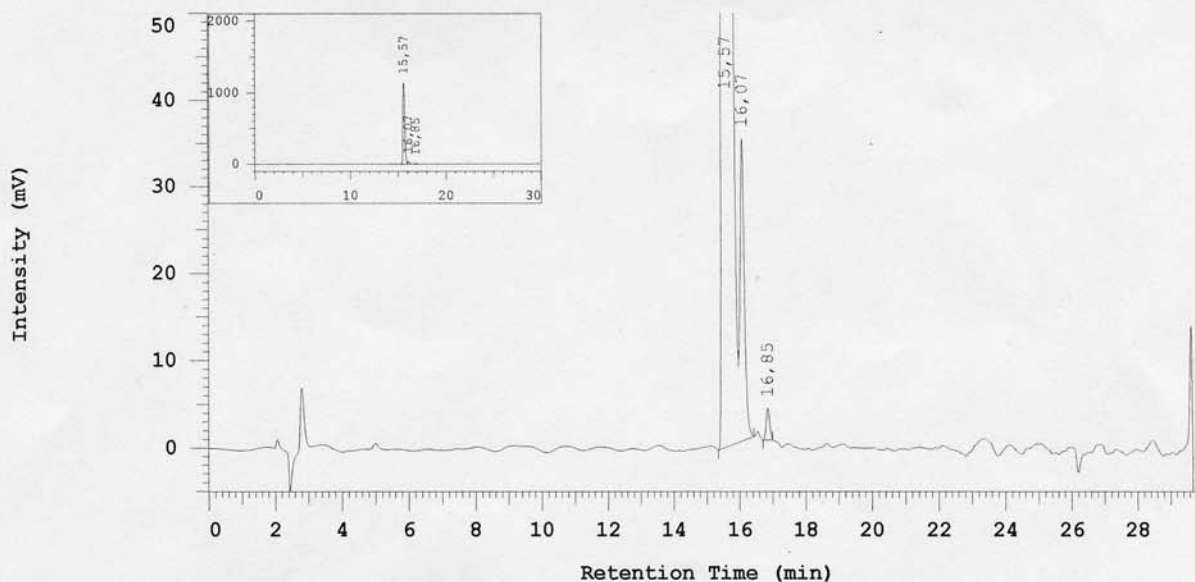

**Acquisition Method: Chromni**

Blank Subtr Sample Name: ACN

Column Type: 010

Solvent A: Wasser + 0,05%TFA

Developed by: Jens

Solvent B: ACN + 0,05%TFA

| No. | RT    | Area     | Conc 1  | BC |
|-----|-------|----------|---------|----|
| 1   | 15,57 | 14092465 | 97,582  | MC |
| 2   | 16,07 | 322761   | 2,235   | MC |
| 3   | 16,85 | 26492    | 0,183   | MC |
|     |       | 14441718 | 100,000 |    |

Peak rejection level: 0

# HPLC

## Comp17d

Analyzed: 19.03.08 20:25

Reported: 20.03.08 10:50

Processed: 20.03.08 10:50

Data Path: D:\WIN32APP\HSM\Christoph\DATA\1102\

Application: Christoph

Series:1102

**Sample Name: ABN151**

Vial Number: 3

Injection from this vial: 1 of 1

Vial Type: UNK

Volume: 5,0 ul

Chrom Type: HPLC Channel : 1

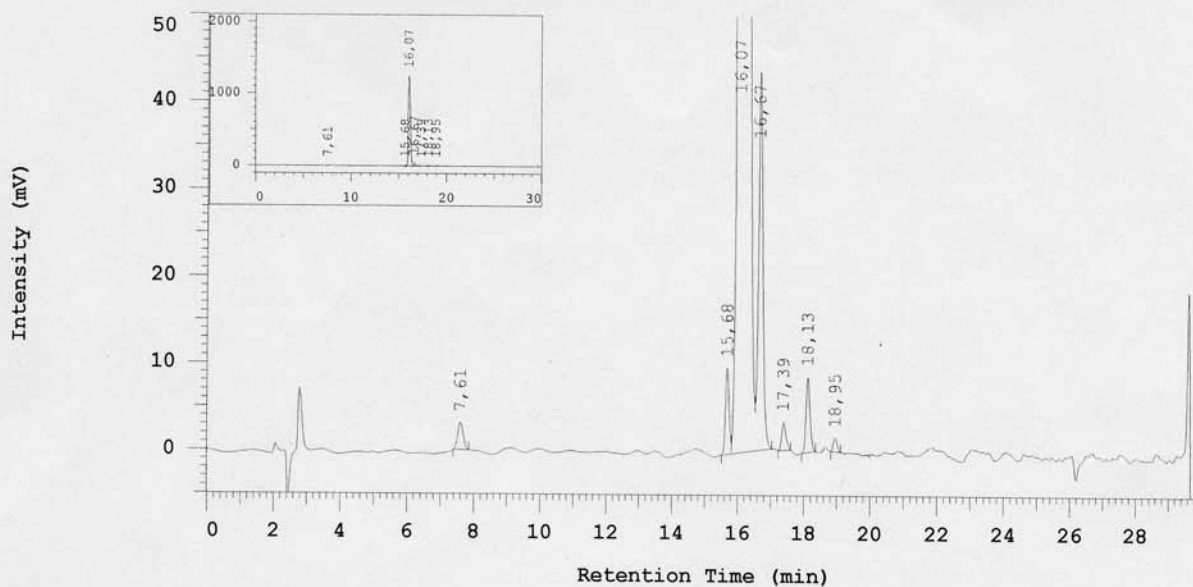

**Acquisition Method: Chromni**

Blank Subtr Sample Name: ACN

Column Type: 010

Developed by: Jens

Solvent A: Wasser + 0,05%TFA

Solvent B: ACN + 0,05%TFA

| No. | RT    | Area     | Conc 1  | BC |
|-----|-------|----------|---------|----|
| 1   | 7,61  | 35416    | 0,202   | MC |
| 2   | 15,68 | 75601    | 0,430   | MC |
| 3   | 16,07 | 16944641 | 96,454  | MC |
| 4   | 16,67 | 398803   | 2,270   | MC |
| 5   | 17,39 | 29035    | 0,165   | MC |
| 6   | 18,13 | 71528    | 0,407   | MC |
| 7   | 18,95 | 12565    | 0,072   | MC |
|     |       | 17567589 | 100,000 |    |

Peak rejection level: 0

# HPLC Comp18a

Analyzed: 06.04.09 23:12

Reported: 07.04.09 13:52  
Processed: 07.04.09 13:52

Data Path: D:\WIN32APP\HSM\Chromni\DATA\0081\

Application: Chromni

**Sample Name: ABN 396**

Injection from this vial: 1 of 1

Series:0081

Vial Number: 5

Vial Type: UNK

Volume: 5,0 ul

Chrom Type: HPLC Channel : 1

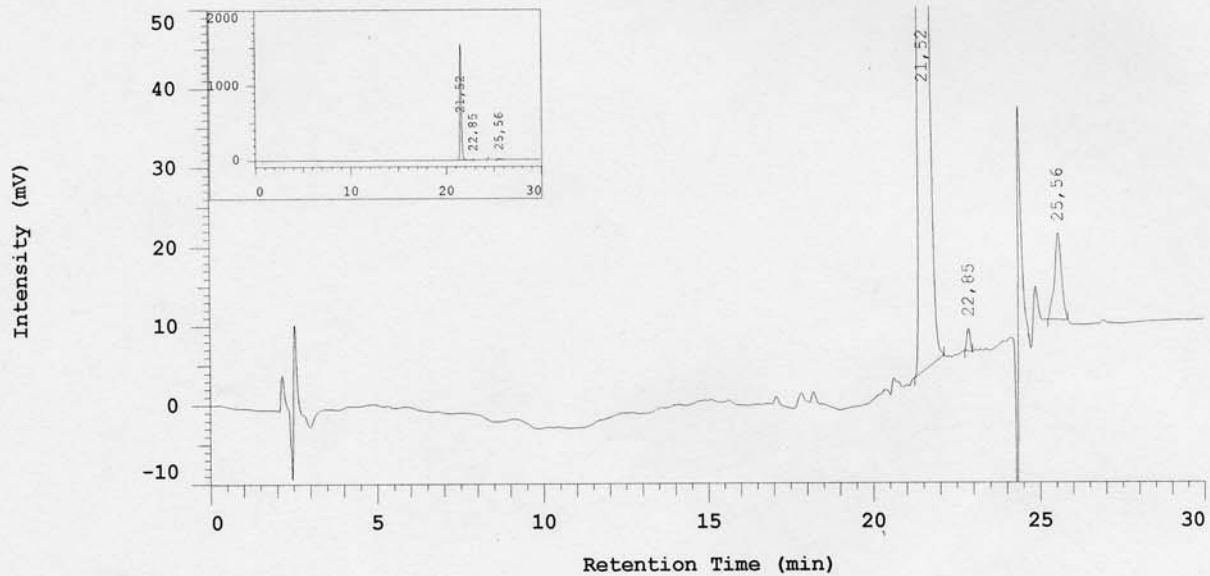

**Acquisition Method: Chromni MeOH**

Blank Subtr Sample Name: MeOH

Column Type: 010

Solvent A: Wasser + 0,05%TFA

Developed by: Christian

Solvent C: MeOH +0,05% TFA

| No. | RT    | Area     | Conc 1  | BC |
|-----|-------|----------|---------|----|
| 1   | 21,52 | 14414144 | 98,781  | MC |
| 2   | 22,85 | 19417    | 0,133   | MC |
| 3   | 25,56 | 158471   | 1,086   | MC |
|     |       | 14592032 | 100,000 |    |

Peak rejection level: 0



# HPLC Comp18b

Analyzed: 06.04.09 23:59

Reported: 19.01.10 14:33  
Processed: 19.01.10 14:33

Data Path: D:\WIN32APP\HSM\Chromni\DATA\0082\

Application: Chromni

**Sample Name: ABN 397**

Injection from this vial: 1 of 1

Series:0082

Vial Number: 6

Vial Type: UNK

Volume: 5,0 ul

Chrom Type: HPLC Channel : 1

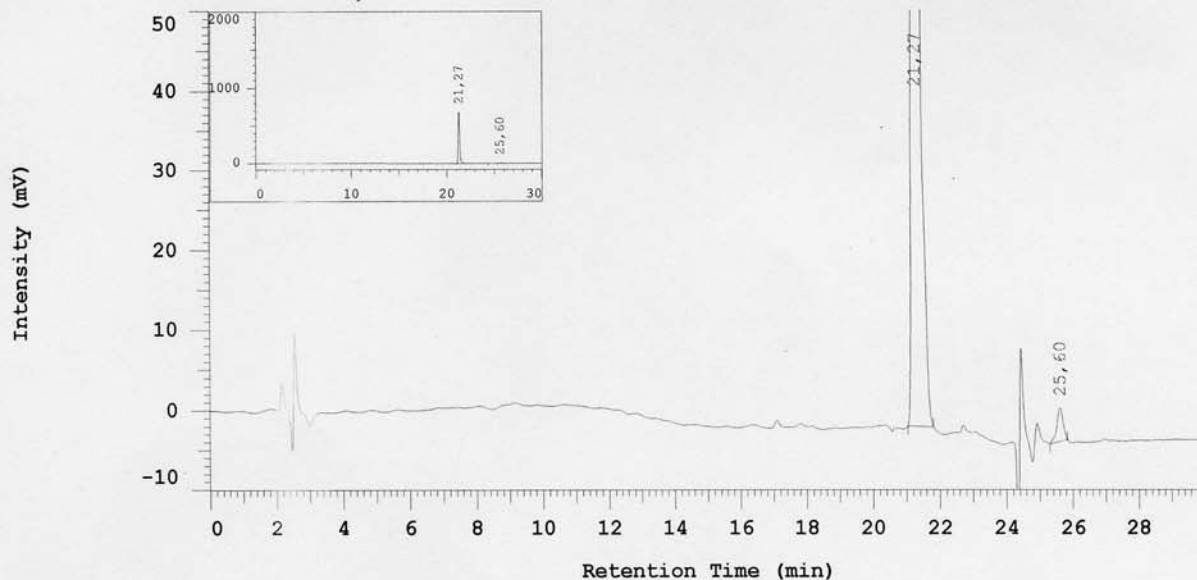

**Acquisition Method: Chromni MeOH**

Blank Subtr Sample Name: MeOH

Column Type: 010

Solvent A: Wasser + 0,05%TFA

Developed by: Christian

Solvent C: MeOH +0,05% TFA

| No. | RT    | Area    | Conc 1  | BC |
|-----|-------|---------|---------|----|
| 1   | 21,27 | 6244803 | 99,141  | MC |
| 2   | 25,60 | 54136   | 0,859   | MC |
|     |       | 6298939 | 100,000 |    |

Peak rejection level: 0

# HPLC Comp18c

Analyzed: 12.03.09 02:20

Reported: 12.03.09 11:06  
Processed: 12.03.09 11:06

Data Path: D:\WIN32APP\HSM\Chromni\DATA\0014\

Application: Chromni

**Sample Name: ABN375**

Injection from this vial: 1 of 1

Series:0014

Vial Number: 11

Vial Type: UNK

Volume: 5,0 ul

Chrom Type: HPLC Channel : 1

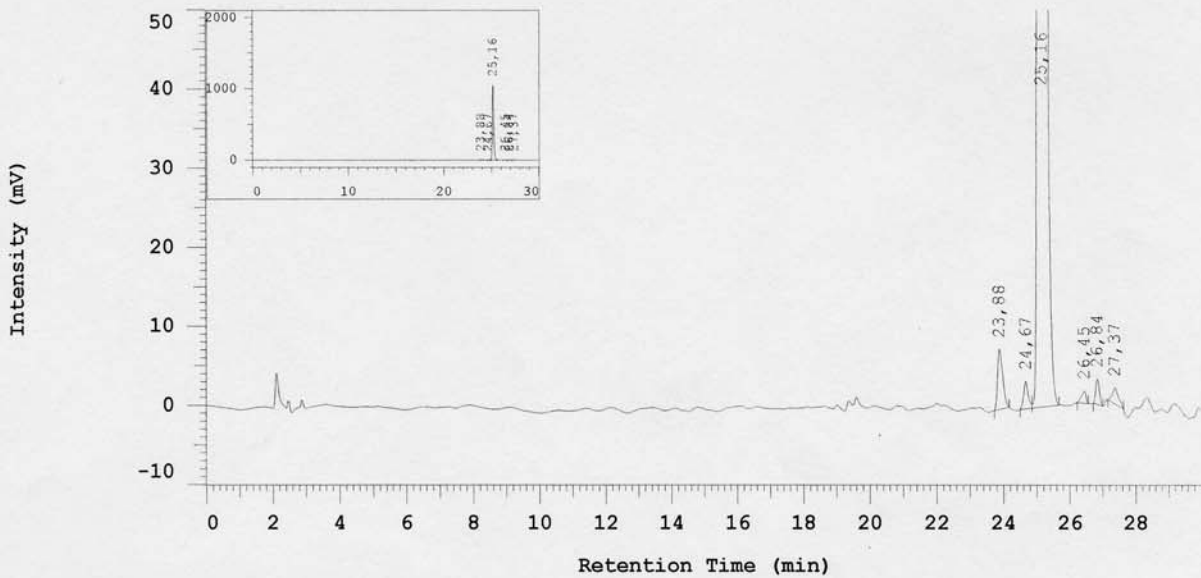

Acquisition Method: Chromni

Blank Subtr Sample Name: ACN

Column Type: 010

Solvent A: Wasser + 0,05%TFA

Developed by: Jens

Solvent B: ACN + 0,05%TFA

| No. | RT    | Area     | Conc 1  | BC |
|-----|-------|----------|---------|----|
| 1   | 23,88 | 80786    | 0,806   | MC |
| 2   | 24,67 | 32190    | 0,321   | MC |
| 3   | 25,16 | 9839170  | 98,214  | MC |
| 4   | 26,45 | 13926    | 0,139   | MC |
| 5   | 26,84 | 24459    | 0,244   | MC |
| 6   | 27,37 | 27579    | 0,275   | MC |
|     |       | 10018110 | 100,000 |    |

Peak rejection level: 0

# HPLC Comp18d

Analyzed: 12.03.09 03:01

Reported: 12.03.09 11:10  
Processed: 12.03.09 11:10

Data Path: D:\WIN32APP\HSM\Chromni\DATA\0015\

Application: Chromni

**Sample Name: ABN376**

Injection from this vial: 1 of 1

Series:0015

Vial Number: 12

Vial Type: UNK

Volume: 5,0 ul

Chrom Type: HPLC Channel : 1

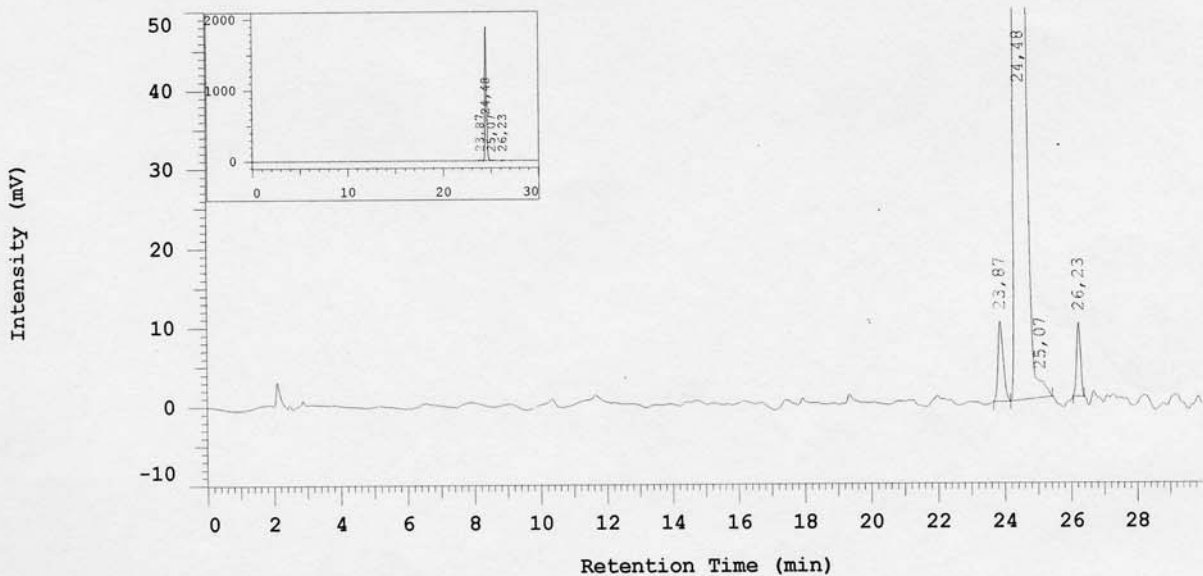

**Acquisition Method: Chromni**

Blank Subtr Sample Name: ACN

Column Type: 010

Solvent A: Wasser + 0,05%TFA

Developed by: Jens

Solvent B: ACN + 0,05%TFA

| No. | RT    | Area     | Conc 1  | BC |
|-----|-------|----------|---------|----|
| 1   | 23,87 | 107767   | 0,569   | BB |
| 2   | 24,48 | 18626544 | 98,391  | MC |
| 3   | 25,07 | 121745   | 0,643   | MC |
| 4   | 26,23 | 75151    | 0,397   | MC |
|     |       | 18931207 | 100,000 |    |

Peak rejection level: 0

# HPLC Comp19a

Analyzed: 07.05.08 20:18

Reported: 19.01.10 14:55  
Processed: 19.01.10 14:55

Data Path: D:\WIN32APP\HSM\Christoph\DATA\1242\

Application: Christoph

**Sample Name: ABN166R**

Injection from this vial: 1 of 1

Series:1242

Vial Number: 3

Vial Type: UNK

Volume: 5,0 ul

Chrom Type: HPLC Channel : 1

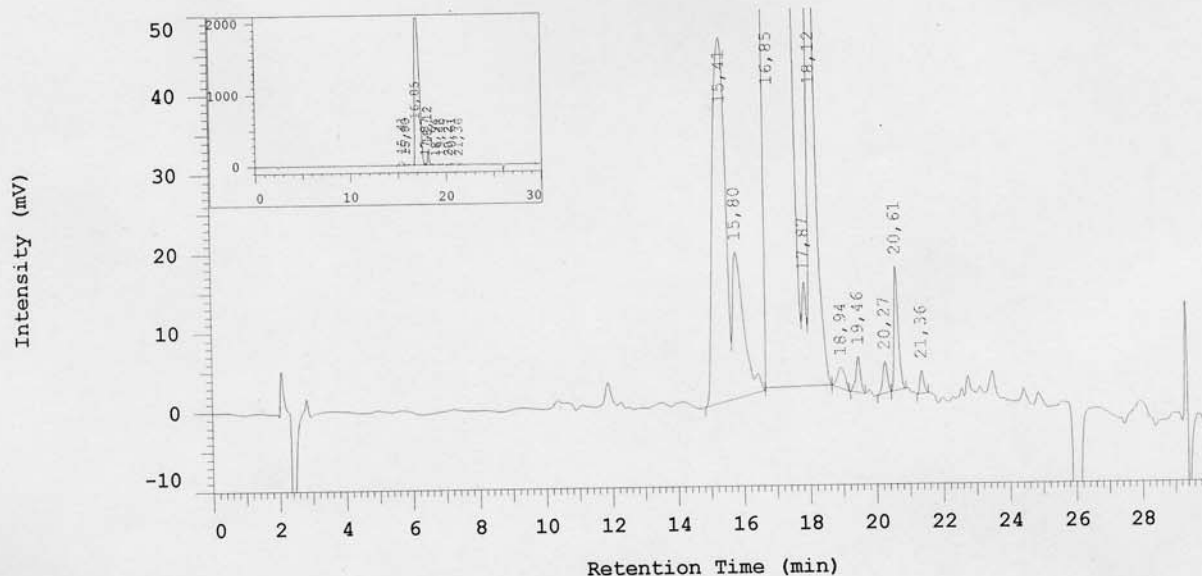

Acquisition Method: Chromni

Blank Subtr Sample Name: ACN

Column Type: 010

Solvent A: Wasser + 0,05%TFA

Developed by: Jens

Solvent B: ACN + 0,05%TFA

| No. | RT    | Area     | Conc 1  | BC |
|-----|-------|----------|---------|----|
| 1   | 15,41 | 1212560  | 1,700   | MC |
| 2   | 15,80 | 434208   | 0,609   | MC |
| 3   | 16,85 | 67342995 | 94,430  | MC |
| 4   | 17,87 | 117177   | 0,164   | MC |
| 5   | 18,12 | 1930957  | 2,708   | MC |
| 6   | 18,94 | 41542    | 0,058   | MC |
| 7   | 19,46 | 42757    | 0,060   | MC |
| 8   | 20,27 | 37713    | 0,053   | MC |
| 9   | 20,61 | 133261   | 0,187   | MC |
| 10  | 21,36 | 22005    | 0,031   | BB |
|     |       | 71315175 | 100,000 |    |

Peak rejection level: 0

# HPLC

## Comp19b

Analyzed: 07.05.08 20:59

Reported: 19.01.10 14:53  
Processed: 19.01.10 14:53

Data Path: D:\WIN32APP\HSM\Christoph\DATA\1243\

Application: Christoph

**Sample Name: ABN 167R**

Injection from this vial: 1 of 1

Series:1243

Vial Number: 4

Vial Type: UNK

Volume: 5,0 ul

Chrom Type: HPLC Channel : 1

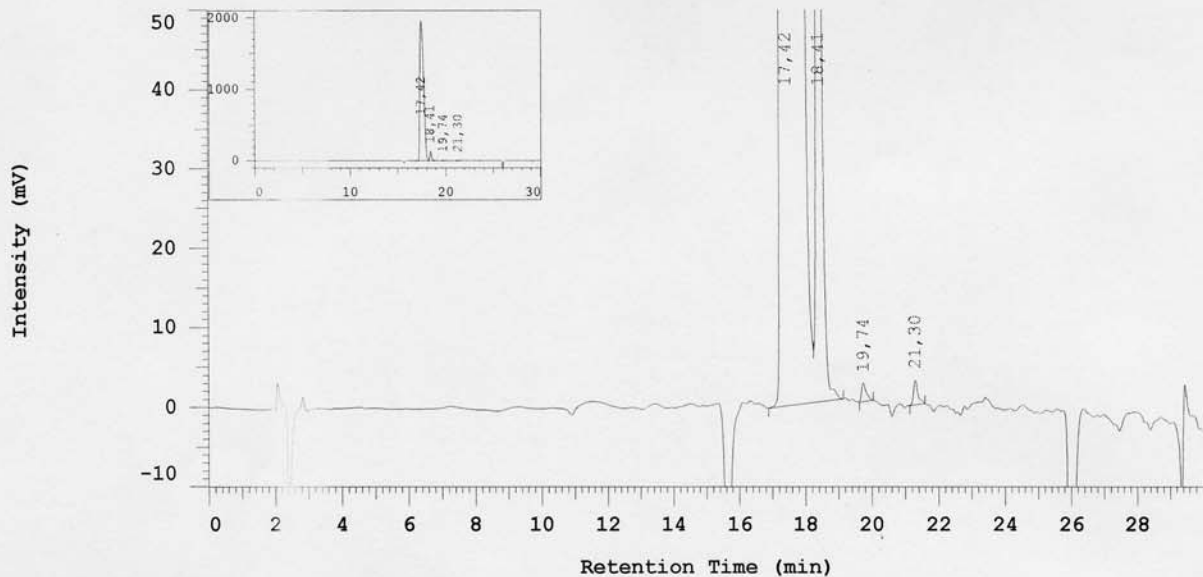

Acquisition Method: Chromni

Blank Subtr Sample Name: ACN

Column Type: 010

Solvent A: Wasser + 0,05%TFA

Developed by: Jens

Solvent B: ACN + 0,05%TFA

| No. | RT    | Area     | Conc 1  | BC |
|-----|-------|----------|---------|----|
| 1   | 17,42 | 51184358 | 97,296  | MC |
| 2   | 18,41 | 1371844  | 2,608   | MC |
| 3   | 19,74 | 22109    | 0,042   | MC |
| 4   | 21,30 | 28286    | 0,054   | MC |
|     |       | 52606597 | 100,000 |    |

Peak rejection level: 0

# HPLC Comp19c

Analyzed: 31.07.08 16:08

Reported: 01.08.08 09:20  
Processed: 01.08.08 09:19

Data Path: D:\WIN32APP\HSM\Christoph\DATA\1508\

Application: Christoph

Sample Name: ABN 255

Injection from this vial: 1 of 1

Series:1508

Vial Number: 28

Vial Type: UNK

Volume: 5,0 ul

Chrom Type: HPLC Channel : 1

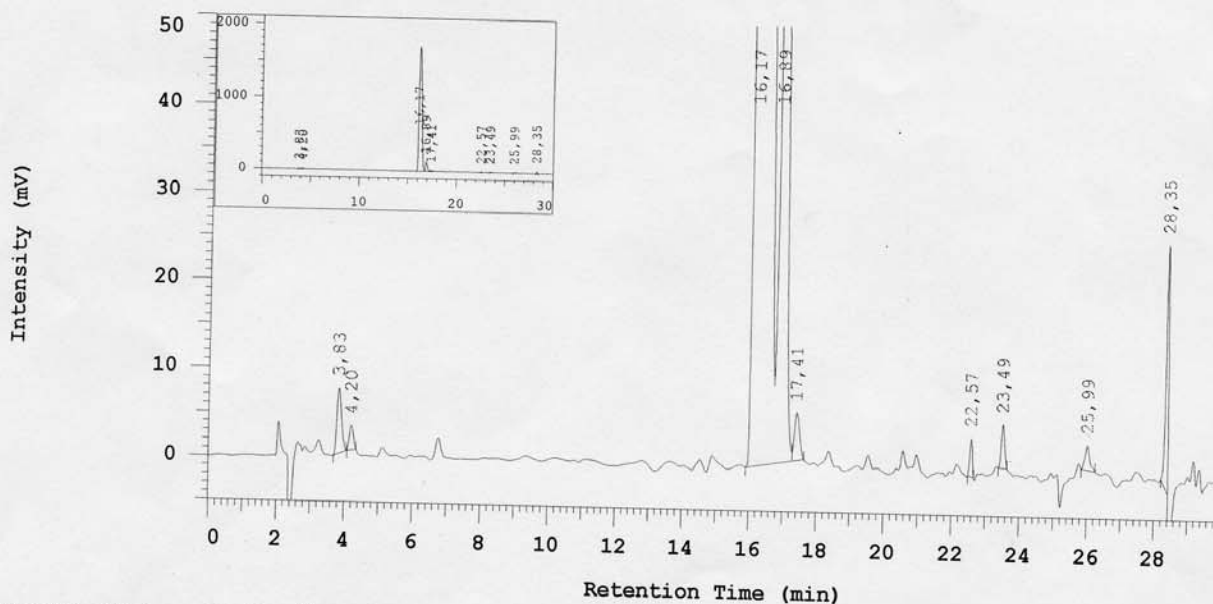

Acquisition Method: Chromni

Blank Subtr Sample Name: ACN

Column Type: 010

Solvent A: Wasser + 0,05%TFA

Developed by: Jens

Solvent B: ACN + 0,05%TFA

| No. | RT    | Area     | Conc 1  | BC |
|-----|-------|----------|---------|----|
| 1   | 3,83  | 66993    |         |    |
| 2   | 4,20  | 22121    | 0,195   | MC |
| 3   | 16,17 | 32388060 | 0,064   | MC |
| 4   | 16,89 | 1648957  | 94,152  | MC |
| 5   | 17,41 | 57644    | 4,794   | MC |
| 6   | 22,57 | 22151    | 0,168   | MC |
| 7   | 23,49 | 32926    | 0,064   | MC |
| 8   | 25,99 | 26522    | 0,096   | MC |
| 9   | 28,35 | 134198   | 0,077   | MC |
|     |       |          | 0,390   | MC |
|     |       | 34399572 | 100,000 |    |

Peak rejection level: 0



# HPLC Comp19d

Analyzed: 17.04.08 01:48

Reported: 17.04.08 09:48

Processed: 17.04.08 09:48

Data Path: D:\WIN32APP\HSM\Christoph\DATA\1202\

Application: Christoph

**Sample Name: ABN173**

Series:1202

Vial Number: 8

Injection from this vial: 1 of 1

Vial Type: UNK

Volume: 5,0 ul

Chrom Type: HPLC Channel : 1

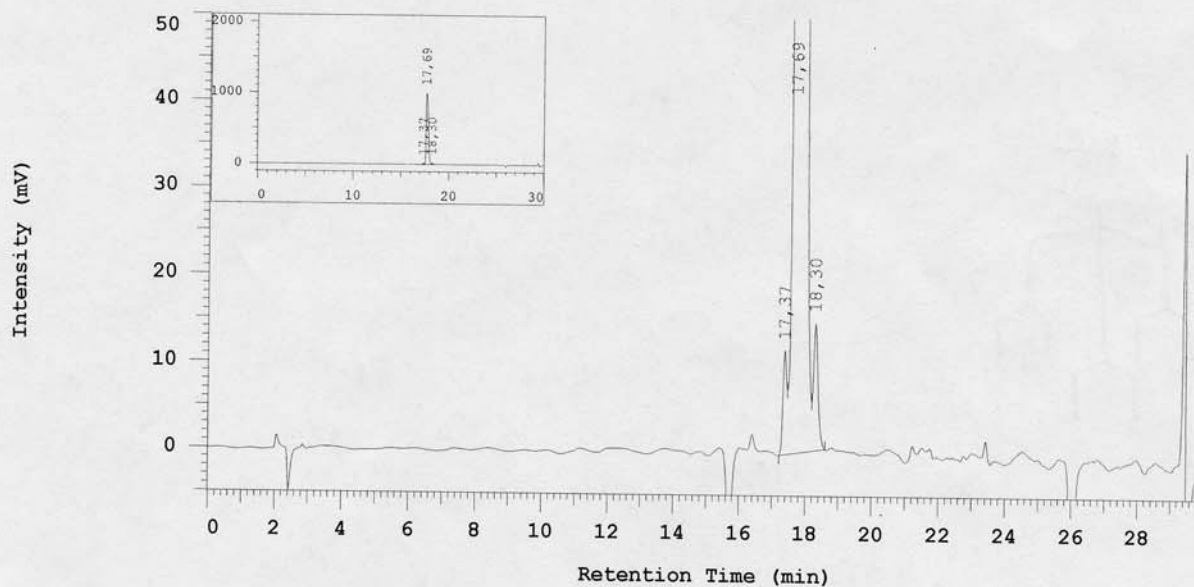

Acquisition Method: Chromni

Blank Subtr Sample Name: ACN

Column Type: 010

Developed by: Jens

Solvent A: Wasser + 0,05%TFA

Solvent B: ACN + 0,05%TFA

| No. | RT    | Area     | Conc 1  | BC |
|-----|-------|----------|---------|----|
| 1   | 17,37 | 90624    | 0,589   | MC |
| 2   | 17,69 | 15153937 | 98,467  | MC |
| 3   | 18,30 | 145328   | 0,944   | MC |
|     |       | 15389889 | 100,000 |    |

Peak rejection level: 0

# HPLC

## Comp20a

Analyzed: 03.09.09 04:38

Reported: 19.01.10 14:25  
Processed: 19.01.10 14:24

Data Path: D:\WIN32APP\HSM\Chromni\DATA\0585\

Application: Chromni

**Sample Name: ABN469A**

Injection from this vial: 1 of 1

Series:0585

Vial Number: 13

Vial Type: UNK

Volume: 5,0 ul

Chrom Type: HPLC Channel : 1

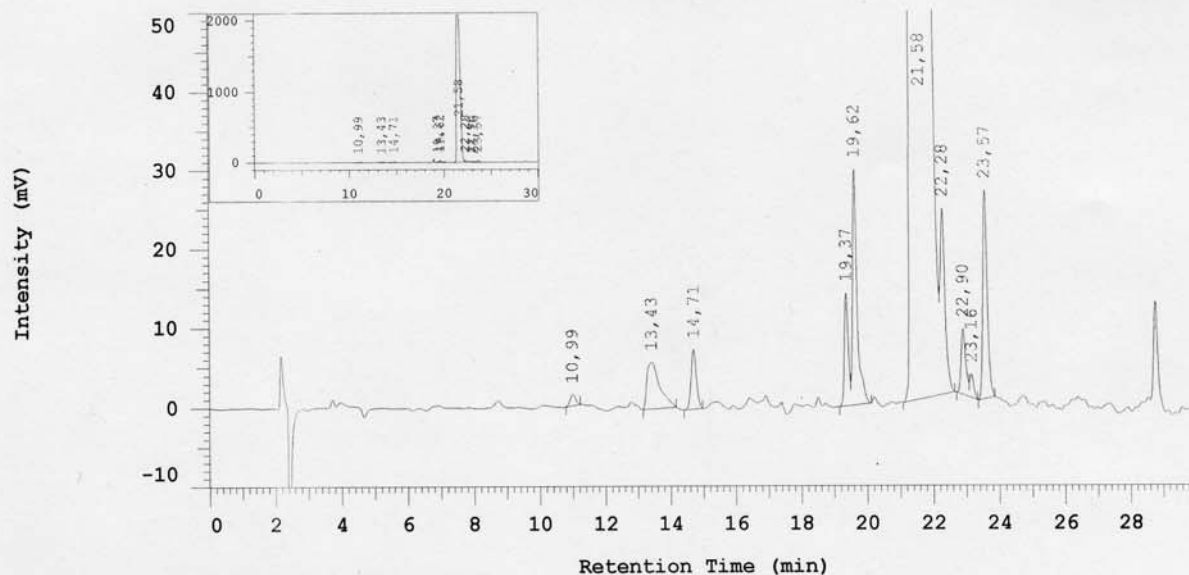

Acquisition Method: Chromni

Blank Subtr Sample Name: ACN

Column Type: 010

Solvent A: Wasser + 0,05%TFA

Developed by: Jens

Solvent B: ACN + 0,05%TFA

| No. | RT    | Area     | Conc 1  | BC |
|-----|-------|----------|---------|----|
| 1   | 10,99 | 15856    | 0,028   | MC |
| 2   | 13,43 | 157245   | 0,278   | MC |
| 3   | 14,71 | 82653    | 0,146   | BB |
| 4   | 19,37 | 114533   | 0,203   | MC |
| 5   | 19,62 | 281061   | 0,497   | MC |
| 6   | 21,58 | 55300294 | 97,798  | MC |
| 7   | 22,28 | 251292   | 0,444   | MC |
| 8   | 22,90 | 77602    | 0,137   | MC |
| 9   | 23,16 | 24090    | 0,043   | MC |
| 10  | 23,57 | 240642   | 0,426   | BB |
|     |       | 56545268 | 100,000 |    |

Peak rejection level: 0

# HPLC Comp20b

Analyzed: 15.10.09 18:46

Reported: 16.10.09 13:30  
Processed: 16.10.09 13:30

Data Path: D:\WIN32APP\HSM\Chromni\DATA\0714\

Application: Chromni

Sample Name: ABN 493B

Series:0714  
Vial Number: 30  
Vial Type: UNK  
Volume: 5,0 ul

Injection from this vial: 1 of 1

Chrom Type: HPLC Channel : 1

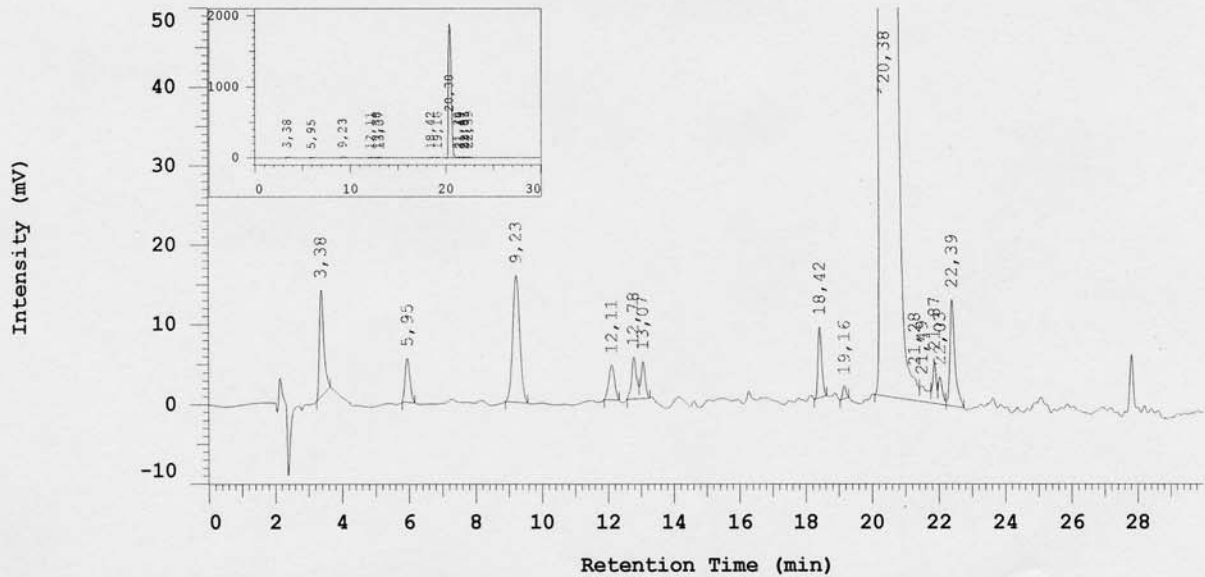

Acquisition Method: Chromni

Blank Subtr Sample Name: ACN

Column Type: 010

Solvent A: Wasser + 0,05%TFA

Developed by: Jens

Solvent B: ACN + 0,05%TFA

| No. | RT    | Area     | Conc 1  | BC |
|-----|-------|----------|---------|----|
| 1   | 3,38  | 117977   | 0,321   | MC |
| 2   | 5,95  | 53430    | 0,145   | MC |
| 3   | 9,23  | 229795   | 0,625   | MC |
| 4   | 12,11 | 52980    | 0,144   | MC |
| 5   | 12,78 | 53638    | 0,146   | MC |
| 6   | 13,07 | 40678    | 0,111   | MC |
| 7   | 18,42 | 67330    | 0,183   | MC |
| 8   | 19,16 | 11143    | 0,030   | BB |
| 9   | 20,38 | 35652464 | 96,983  | MC |
| 10  | 21,28 | 245452   | 0,668   | MC |
| 11  | 21,49 | 34075    | 0,093   | MC |
| 12  | 21,87 | 37677    | 0,102   | MC |
| 13  | 22,03 | 28129    | 0,077   | MC |
| 14  | 22,39 | 136647   | 0,372   | MC |
|     |       | 36761415 | 100,000 |    |

Peak rejection level: 0

# HPLC

## Comp20c

Analyzed: 12.03.09 05:06

Reported: 12.03.09 11:19  
Processed: 12.03.09 11:19

Data Path: D:\WIN32APP\HSM\Chromni\DATA\0018\

Application: Chromni

**Sample Name: ABN382**

Injection from this vial: 1 of 1

Series:0018

Vial Number: 14

Vial Type: UNK

Volume: 5,0 ul

Chrom Type: HPLC Channel : 1

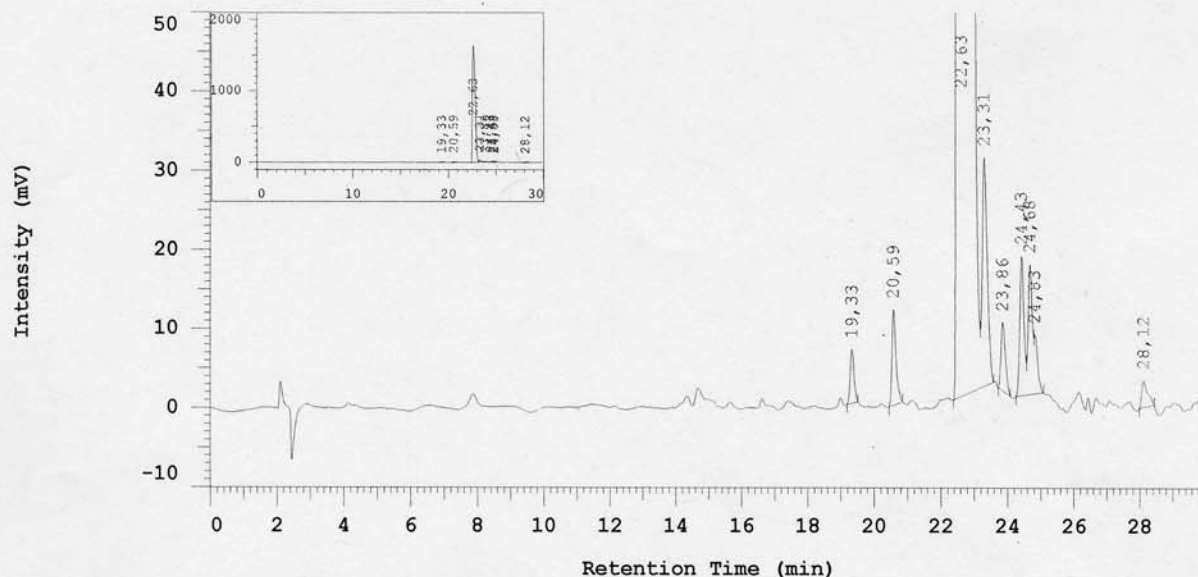

Acquisition Method: Chromni

Blank Subtr Sample Name: ACN

Column Type: 010

Solvent A: Wasser + 0,05%TFA

Developed by: Jens

Solvent B: ACN + 0,05%TFA

| No. | RT    | Area     | Conc 1  | BC |
|-----|-------|----------|---------|----|
| 1   | 19,33 | 54341    | 0,170   | MC |
| 2   | 20,59 | 100714   | 0,315   | MC |
| 3   | 22,63 | 31011926 | 97,094  | MC |
| 4   | 23,31 | 303564   | 0,950   | MC |
| 5   | 23,86 | 78402    | 0,245   | MC |
| 6   | 24,43 | 150274   | 0,470   | MC |
| 7   | 24,68 | 139714   | 0,437   | MC |
| 8   | 24,83 | 58841    | 0,184   | MC |
| 9   | 28,12 | 42230    | 0,132   | MC |
|     |       | 31940006 | 100,000 |    |

Peak rejection level: 0

# HPLC Comp20d

Analyzed: 09.12.09 21:02

Reported: 19.01.10 14:19  
Processed: 10.12.09 10:31

Data Path: D:\WIN32APP\HSM\Chromni\DATA\0934\

Application: Chromni

**Sample Name: ABN 536B**

Injection from this vial: 1 of 1

Series:0934

Vial Number: 4

Vial Type: UNK

Volume: 5,0 ul

Chrom Type: HPLC Channel : 1

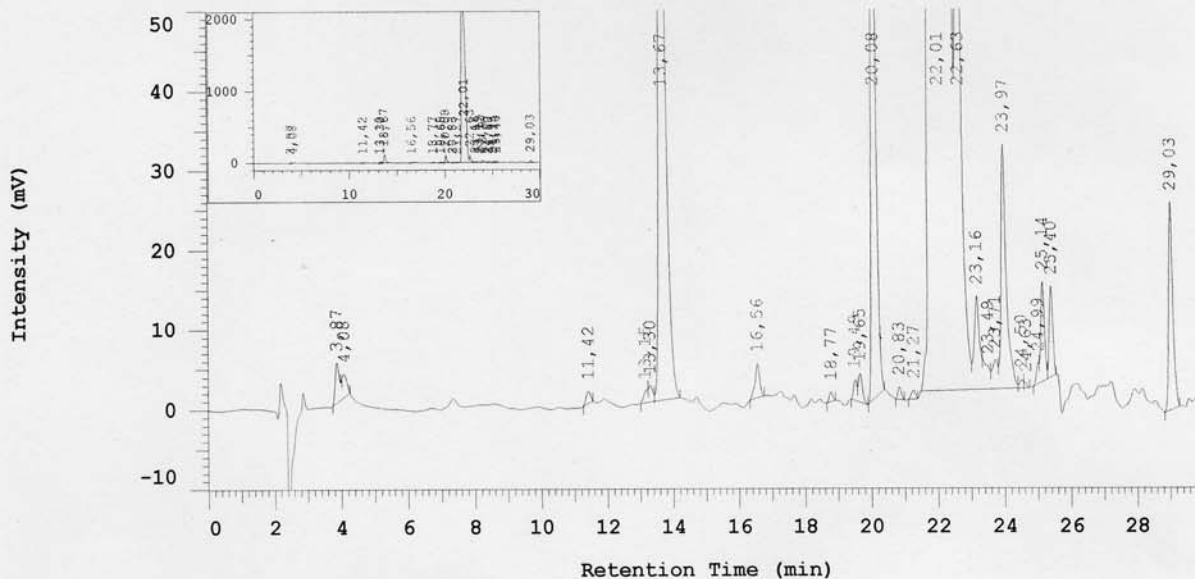

**Acquisition Method: Chromni**

Blank Subtr Sample Name: ACN

Column Type: 010

Solvent A: Wasser + 0,05%TFA

Developed by: Jens

Solvent B: ACN + 0,05%TFA

| No. | RT    | Area     | Conc 1 | BC |
|-----|-------|----------|--------|----|
| 1   | 3,87  | 39453    | 0,069  | MC |
| 2   | 4,08  | 27753    | 0,048  | MC |
| 3   | 11,42 | 13350    | 0,023  | MC |
| 4   | 13,15 | 12343    | 0,022  | MC |
| 5   | 13,30 | 19177    | 0,034  | MC |
| 6   | 13,67 | 1430128  | 2,498  | MC |
| 7   | 16,56 | 40534    | 0,071  | BB |
| 8   | 18,77 | 8341     | 0,015  | MC |
| 9   | 19,49 | 16935    | 0,030  | MC |
| 10  | 19,65 | 29650    | 0,052  | MC |
| 11  | 20,08 | 883568   | 1,544  | MC |
| 12  | 20,83 | 10934    | 0,019  | MC |
| 13  | 21,27 | 9491     | 0,017  | MC |
| 14  | 22,01 | 52644403 | 91,972 | MC |
| 15  | 22,63 | 1073116  | 1,875  | MC |
| 16  | 23,16 | 130922   | 0,229  | MC |
| 17  | 23,49 | 43631    | 0,076  | MC |
| 18  | 23,71 | 39661    | 0,069  | MC |
| 19  | 23,97 | 334300   | 0,584  | MC |
| 20  | 24,50 | 7991     | 0,014  | MC |
| 21  | 24,63 | 3594     | 0,006  | MC |
| 22  | 24,99 | 12887    | 0,023  | MC |
| 23  | 25,14 | 97628    | 0,171  | MC |
| 24  | 25,40 | 82741    | 0,145  | MC |
| 25  | 29,03 | 226928   | 0,396  | MC |

Comp21a

Analyzed: 05.11.09 03:48

Reported: 05.11.09 09:57

Processed: 05.11.09 09:57

Data Path: D:\WIN32APP\HSM\Chromni\DATA\0796\

Application: Chromni

Series:0796

Vial Number: 13

Sample Name: ABN517

Vial Type: UNK

Injection from this vial: 1 of 1

Volume: 5,0 ul

Chrom Type: HPLC Channel : 1

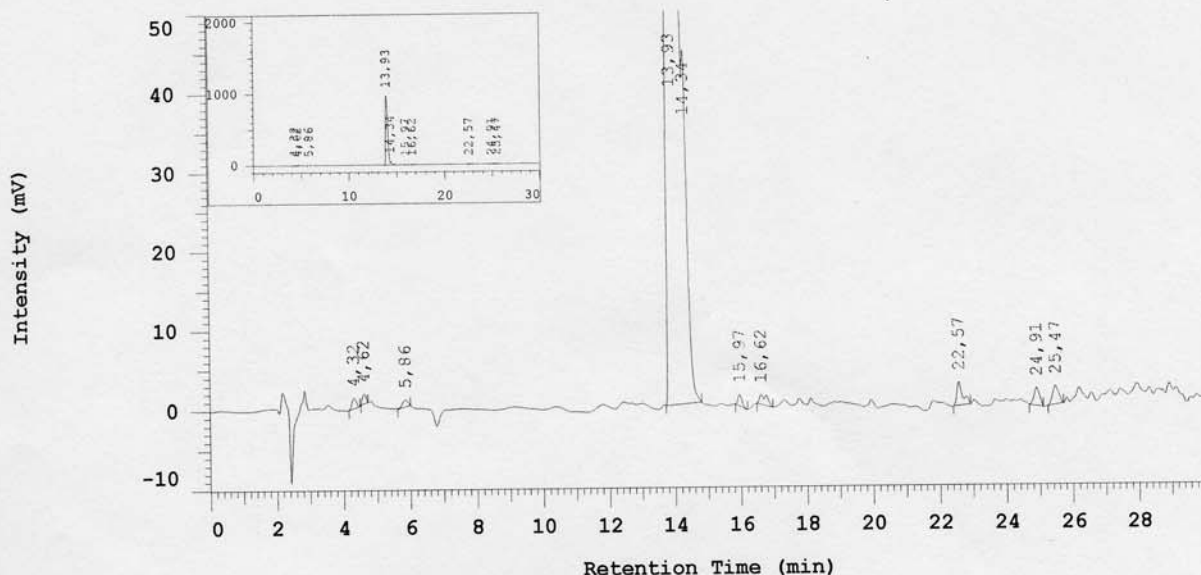

Acquisition Method: Chromni

Blank Subtr Sample Name: ACN

Column Type: 010

Developed by: Jens

Solvent A: Wasser + 0,05%TFA

Solvent B: ACN + 0,05%TFA

| No. | RT    | Area     | Conc 1  | BC |
|-----|-------|----------|---------|----|
| 1   | 4,32  | 11468    | 0,077   | MC |
| 2   | 4,62  | 8616     | 0,058   | MC |
| 3   | 5,86  | 8931     | 0,060   | MC |
| 4   | 13,93 | 14339144 | 96,329  | MC |
| 5   | 14,34 | 396323   | 2,662   | MC |
| 6   | 15,97 | 11337    | 0,076   | BB |
| 7   | 16,62 | 19598    | 0,132   | MC |
| 8   | 22,57 | 35397    | 0,238   | MC |
| 9   | 24,91 | 25370    | 0,170   | MC |
| 10  | 25,47 | 29374    | 0,197   | MC |
|     |       | 14885558 | 100,000 |    |

Peak rejection level: 0



# HPLC Comp21b

Analyzed: 10.11.09 22:34

Reported: 11.11.09 09:45  
Processed: 11.11.09 09:45

Data Path: D:\WIN32APP\HSM\Chromni\DATA\0813\  
Application: Chromni

**Sample Name: ABN 514R**

Injection from this vial: 1 of 1

Series:0813  
Vial Number: 11  
Vial Type: UNK  
Volume: 5,0 ul

Chrom Type: HPLC Channel : 1

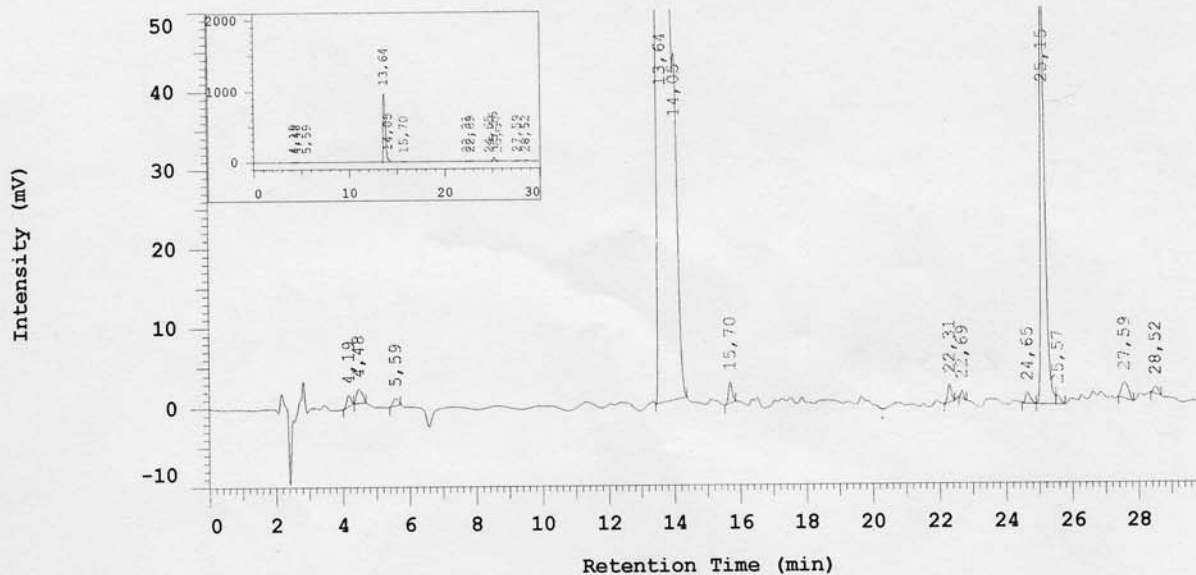

**Acquisition Method: Chromni**

Blank Subtr Sample Name: ACN

Column Type: 010

Solvent A: Wasser + 0,05%TFA

Developed by: Jens

Solvent B: ACN + 0,05%TFA

| No. | RT    | Area     | Conc 1  | BC |
|-----|-------|----------|---------|----|
| 1   | 4,19  | 11855    | 0,077   | MC |
| 2   | 4,48  | 20930    | 0,136   | MC |
| 3   | 5,59  | 9501     | 0,062   | MC |
| 4   | 13,64 | 14299228 | 93,188  | MC |
| 5   | 14,05 | 378097   | 2,464   | MC |
| 6   | 15,70 | 20115    | 0,131   | BB |
| 7   | 22,31 | 16691    | 0,109   | BB |
| 8   | 22,69 | 5122     | 0,033   | BB |
| 9   | 24,65 | 12954    | 0,084   | BB |
| 10  | 25,15 | 521422   | 3,398   | BB |
| 11  | 25,57 | 9892     | 0,064   | MC |
| 12  | 27,59 | 29858    | 0,195   | BB |
| 13  | 28,52 | 8900     | 0,058   | MC |
|     |       | 15344565 | 100,000 |    |

Peak rejection level: 0

# HPLC

## Comp21c

Analyzed: 30.07.09 17:32

Reported: 31.07.09 13:24  
Processed: 31.07.09 13:23

Data Path: D:\WIN32APP\HSM\Chromni\DATA\0470\

Application: Chromni

**Sample Name: ABN458**

Injection from this vial: 1 of 1

Series:0470

Vial Number: 23

Vial Type: UNK

Volume: 5,0 ul

Chrom Type: HPLC Channel : 1

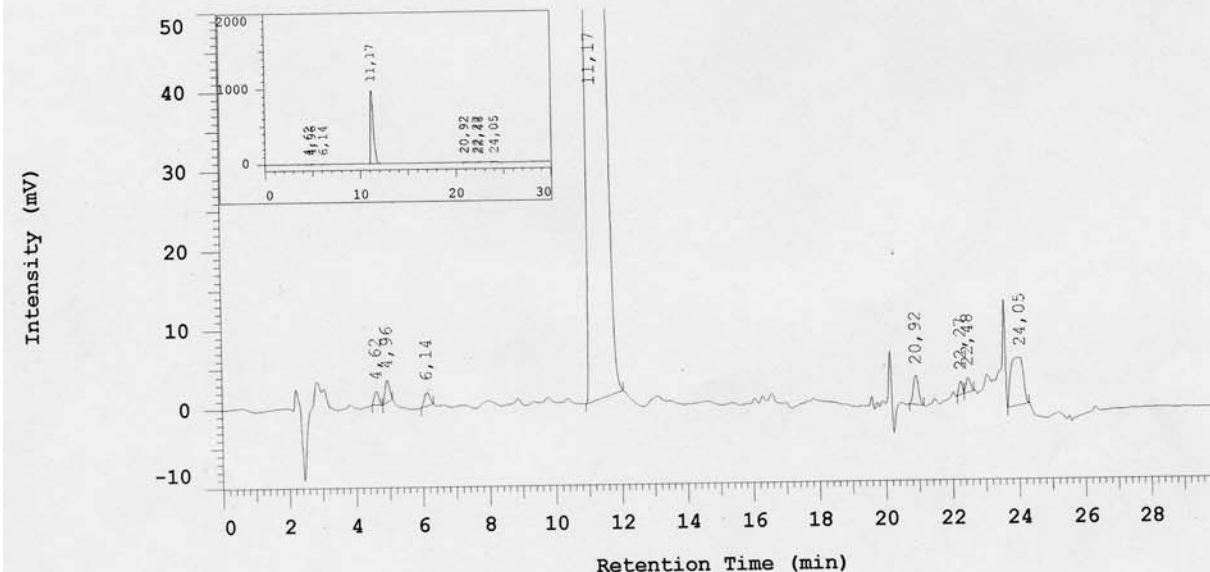

Acquisition Method: Chromni MeOH

Blank Subtr Sample Name: MeOH

Column Type: 010

Solvent A: Wasser + 0,05%TFA

Developed by: Christian

Solvent C: MeOH +0,05% TFA

| No. | RT    | Area     | Conc 1  | BC |
|-----|-------|----------|---------|----|
| 1   | 4,62  | 15327    | 0,079   | MC |
| 2   | 4,96  | 24985    | 0,129   | MC |
| 3   | 6,14  | 18312    | 0,095   | MC |
| 4   | 11,17 | 19085793 | 98,555  | MC |
| 5   | 20,92 | 39305    | 0,203   | MC |
| 6   | 22,27 | 11886    | 0,061   | MC |
| 7   | 22,48 | 16743    | 0,086   | MC |
| 8   | 24,05 | 153247   | 0,791   | MC |
|     |       | 19365598 | 100,000 |    |

Peak rejection level: 0

# HPLC

## Comp21d

Reported: 14.01.10 16:50  
Processed: 14.01.10 16:50

Data Path: D:\WIN32APP\HSM\Chromni\DATA\1023\

Application: Chromni

**Sample Name: ABN540R**

Injection from this vial: 1 of 1

Series:1023

Vial Number: 8

Vial Type: UNK

Volume: 5,0 ul

Chrom Type: HPLC Channel : 1

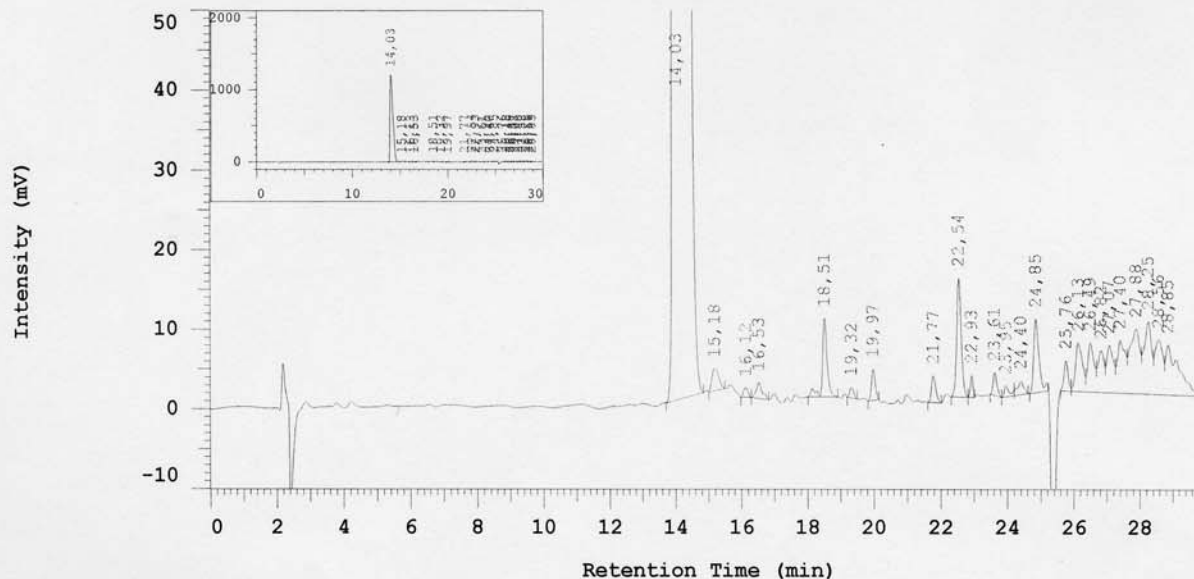

Acquisition Method: Chromni

Blank Subtr Sample Name: ACN

Column Type: 010

Solvent A: Wasser + 0,05%TFA

Developed by: Jens

Solvent B: ACN + 0,05%TFA

| No. | RT    | Area     | Conc 1 | BC |
|-----|-------|----------|--------|----|
| 1   | 14,03 | 23749172 | 93,603 | BB |
| 2   | 15,18 | 40179    | 0,158  | MC |
| 3   | 16,12 | 10970    | 0,043  | BB |
| 4   | 16,53 | 24502    | 0,097  | MC |
| 5   | 18,51 | 98689    | 0,389  | MC |
| 6   | 19,32 | 11095    | 0,044  | MC |
| 7   | 19,97 | 29392    | 0,116  | BB |
| 8   | 21,77 | 29324    | 0,116  | BB |
| 9   | 22,54 | 137927   | 0,544  | BB |
| 10  | 22,93 | 14045    | 0,055  | BB |
| 11  | 23,61 | 22512    | 0,089  | BB |
| 12  | 23,95 | 13780    | 0,054  | MC |
| 13  | 24,40 | 22640    | 0,089  | MC |
| 14  | 24,85 | 102202   | 0,403  | MC |
| 15  | 25,76 | 32062    | 0,126  | MC |
| 16  | 26,13 | 86381    | 0,340  | MC |
| 17  | 26,49 | 80263    | 0,316  | MC |
| 18  | 26,82 | 66787    | 0,263  | MC |
| 19  | 27,07 | 84810    | 0,334  | MC |
| 20  | 27,40 | 108059   | 0,426  | MC |
| 21  | 27,88 | 168858   | 0,666  | MC |
| 22  | 28,25 | 144453   | 0,569  | MC |
| 23  | 28,56 | 115999   | 0,457  | MC |
| 24  | 28,85 | 178125   | 0,702  | MC |

25372226

100,000

Analyzed: 27.08.09 08:59

## Comp22a

Reported: 27.08.09 14:29  
Processed: 27.08.09 14:29

Data Path: D:\WIN32APP\HSM\Chromni\DATA\0567\

Application: Chromni

**Sample Name: ABN468A**

Injection from this vial: 1 of 1

Series:0567

Vial Number: 19

Vial Type: UNK

Volume: 5,0 ul

Chrom Type: HPLC Channel : 1

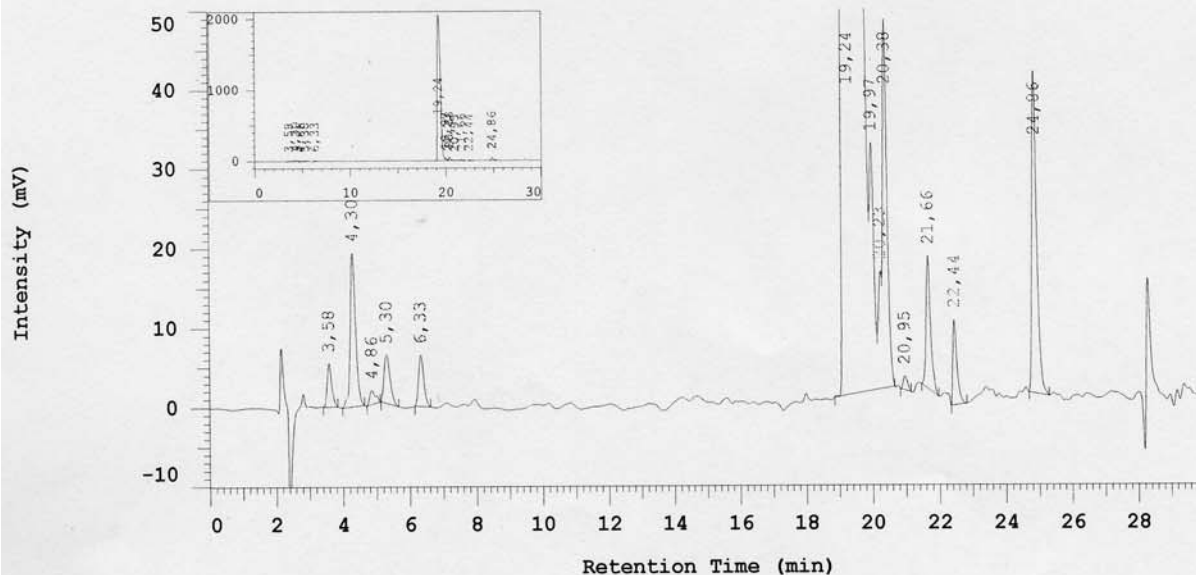

**Acquisition Method: Chromni**

Blank Subtr Sample Name: ACN

Column Type: 010

Solvent A: Wasser + 0,05%TFA

Developed by: Jens

Solvent B: ACN + 0,05%TFA

| No. | RT    | Area     | Conc 1  | BC |
|-----|-------|----------|---------|----|
| 1   | 3,58  | 49391    | 0,108   | MC |
| 2   | 4,30  | 209369   | 0,459   | MC |
| 3   | 4,86  | 20508    | 0,045   | MC |
| 4   | 5,30  | 75024    | 0,164   | MC |
| 5   | 6,33  | 67253    | 0,147   | MC |
| 6   | 19,24 | 43735161 | 95,848  | MC |
| 7   | 19,97 | 281365   | 0,617   | MC |
| 8   | 20,23 | 97249    | 0,213   | MC |
| 9   | 20,38 | 429939   | 0,942   | MC |
| 10  | 20,95 | 15779    | 0,035   | MC |
| 11  | 21,66 | 152207   | 0,334   | BB |
| 12  | 22,44 | 89895    | 0,197   | BB |
| 13  | 24,86 | 406571   | 0,891   | MC |
|     |       | 45629711 | 100,000 |    |

Peak rejection level: 0

# HPLC Comp22b

Analyzed: 03.09.09 03:56

Reported: 03.09.09 13:16  
Processed: 03.09.09 13:16

Data Path: D:\WIN32APP\HSM\Chromni\DATA\0584\

Application: Chromni

**Sample Name: ABN468B**

Injection from this vial: 1 of 1

Series:0584

Vial Number: 12

Vial Type: UNK

Volume: 5,0 ul

Chrom Type: HPLC Channel : 1

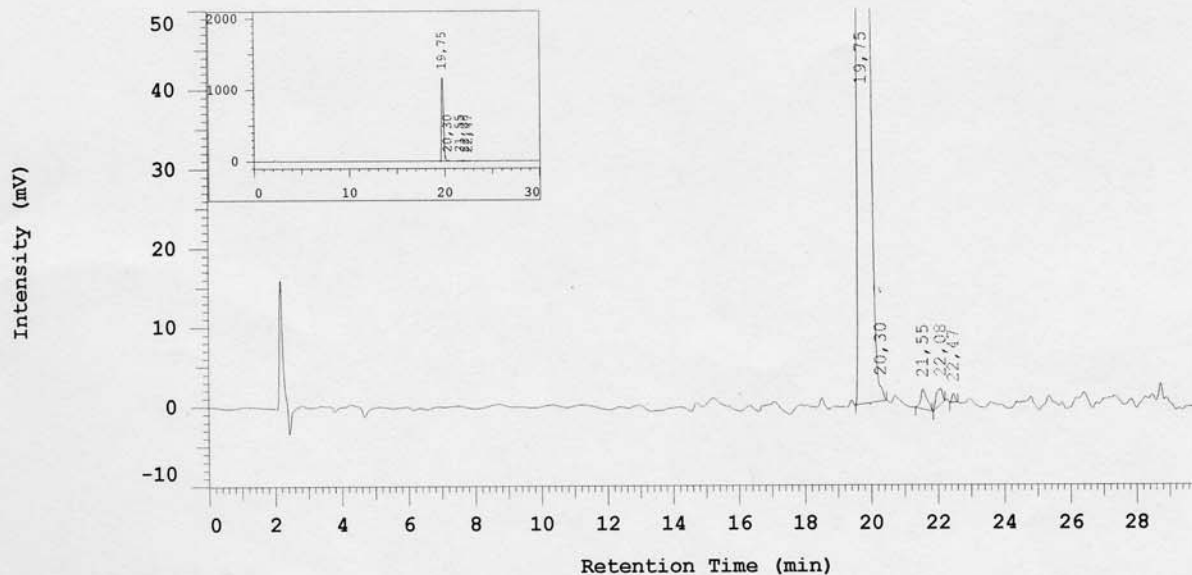

Acquisition Method: Chromni

Blank Subtr Sample Name: ACN

Column Type: 010

Developed by: Jens

Solvent A: Wasser + 0,05%TFA

Solvent B: ACN + 0,05%TFA

| No. | RT    | Area     | Conc 1  | BC |
|-----|-------|----------|---------|----|
| 1   | 19,75 | 15014985 | 98,002  | MC |
| 2   | 20,30 | 240424   | 1,569   | MC |
| 3   | 21,55 | 31969    | 0,209   | MC |
| 4   | 22,08 | 26908    | 0,176   | BB |
| 5   | 22,47 | 6740     | 0,044   | BB |
|     |       | 15321026 | 100,000 |    |

Peak rejection level: 0

# HPLC Comp22c

Analyzed: 03.12.09 11:35

Reported: 03.12.09 15:59  
Processed: 03.12.09 15:59

Data Path: D:\WIN32APP\HSM\Chromni\DATA\0925\  
Application: Chromni

**Sample Name: ABN537A**

Injection from this vial: 1 of 1

Series:0925  
Vial Number: 20  
Vial Type: UNK  
Volume: 5,0 ul

Chrom Type: HPLC Channel : 1

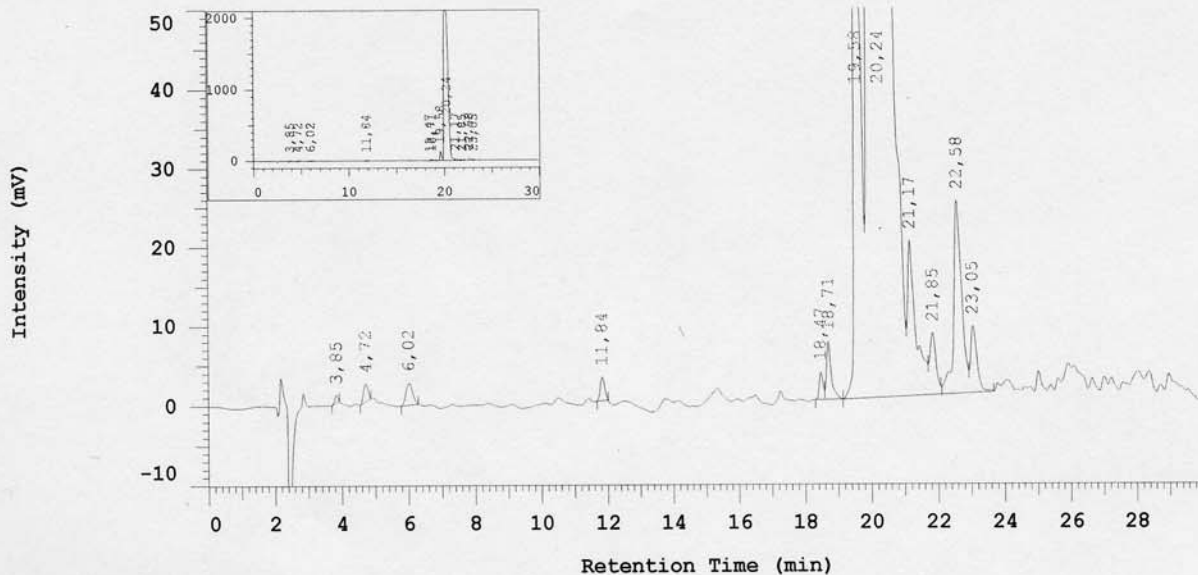

Acquisition Method: Chromni

Blank Subtr Sample Name: ACN

Column Type: 010

Solvent A: Wasser + 0,05%TFA

Developed by: Jens

Solvent B: ACN + 0,05%TFA

| No. | RT    | Area     | Conc 1  | BC |
|-----|-------|----------|---------|----|
| 1   | 3,85  | 5809     | 0,009   | MC |
| 2   | 4,72  | 19797    | 0,030   | MC |
| 3   | 6,02  | 36910    | 0,056   | MC |
| 4   | 11,84 | 26681    | 0,040   | BB |
| 5   | 18,47 | 26151    | 0,040   | BV |
| 6   | 18,71 | 72173    | 0,109   | VB |
| 7   | 19,58 | 1351455  | 2,046   | BV |
| 8   | 20,24 | 63566649 | 96,215  | VV |
| 9   | 21,17 | 339824   | 0,514   | MC |
| 10  | 21,85 | 102999   | 0,156   | MC |
| 11  | 22,58 | 407944   | 0,617   | MC |
| 12  | 23,05 | 110916   | 0,168   | MC |
|     |       | 66067308 | 100,000 |    |

Peak rejection level: 0



# HPLC

## Comp22d

Analyzed: 09.12.09 21:44

Reported: 19.01.10 14:17  
Processed: 19.01.10 14:17

Data Path: D:\WIN32APP\HSM\Chromni\DATA\0935\  
Application: Chromni

**Sample Name: ABN 537B**

Injection from this vial: 1 of 1

Series:0935  
Vial Number: 5  
Vial Type: UNK  
Volume: 5,0 ul

Chrom Type: HPLC Channel : 1

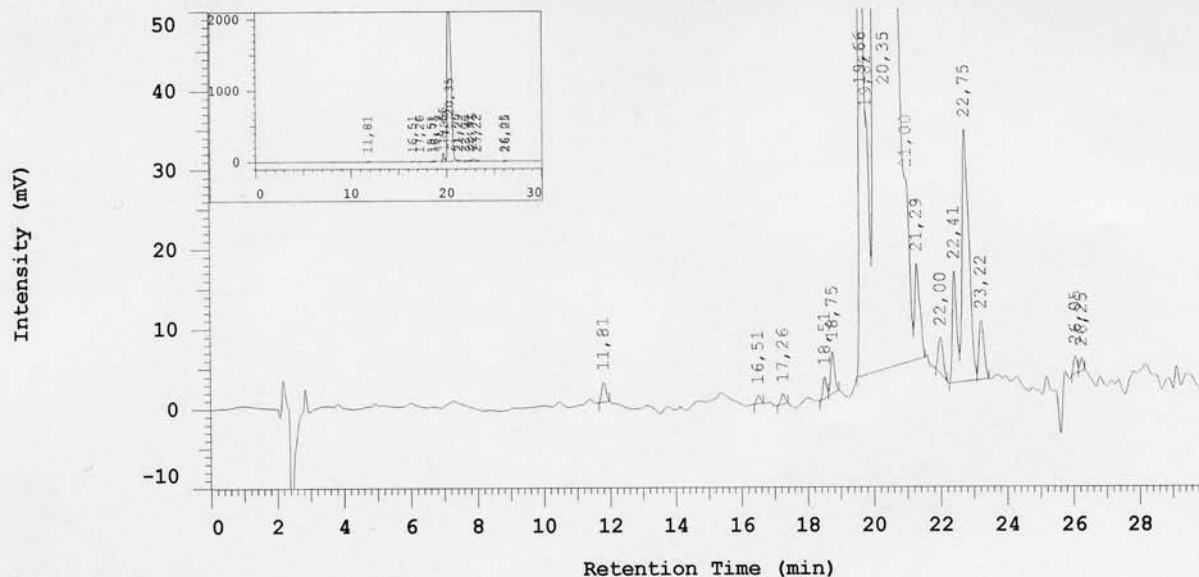

Acquisition Method: Chromni

Blank Subtr Sample Name: ACN

Column Type: 010

Solvent A: Wasser + 0,05%TFA

Developed by: Jens

Solvent B: ACN + 0,05%TFA

| No. | RT    | Area     | Conc 1  | BC |
|-----|-------|----------|---------|----|
| 1   | 11,81 | 21965    | 0,036   | MC |
| 2   | 16,51 | 8350     | 0,014   | MC |
| 3   | 17,26 | 10872    | 0,018   | MC |
| 4   | 18,51 | 19733    | 0,032   | MC |
| 5   | 18,75 | 42093    | 0,069   | MC |
| 6   | 19,66 | 940914   | 1,532   | MC |
| 7   | 19,82 | 197538   | 0,322   | MC |
| 8   | 20,35 | 57617132 | 93,821  | MC |
| 9   | 21,00 | 1713847  | 2,791   | MC |
| 10  | 21,29 | 126390   | 0,206   | MC |
| 11  | 22,00 | 44354    | 0,072   | MC |
| 12  | 22,41 | 124555   | 0,203   | MC |
| 13  | 22,75 | 441256   | 0,719   | MC |
| 14  | 23,22 | 75856    | 0,124   | MC |
| 15  | 26,05 | 16216    | 0,026   | MC |
| 16  | 26,25 | 10948    | 0,018   | MC |
|     |       | 61412019 | 100,000 |    |

Peak rejection level: 0

# HPLC Comp23a

Analyzed: 06.08.09 18:02

Reported: 07.08.09 11:13

Processed: 07.08.09 11:13

Data Path: D:\WIN32APP\HSM\Chromni\DATA\0505\

Application: Chromni

Sample Name: ABN 463

Injection from this vial: 1 of 1

Series:0505

Vial Number: 28

Vial Type: UNK

Volume: 5,0 ul

Chrom Type: HPLC Channel : 1

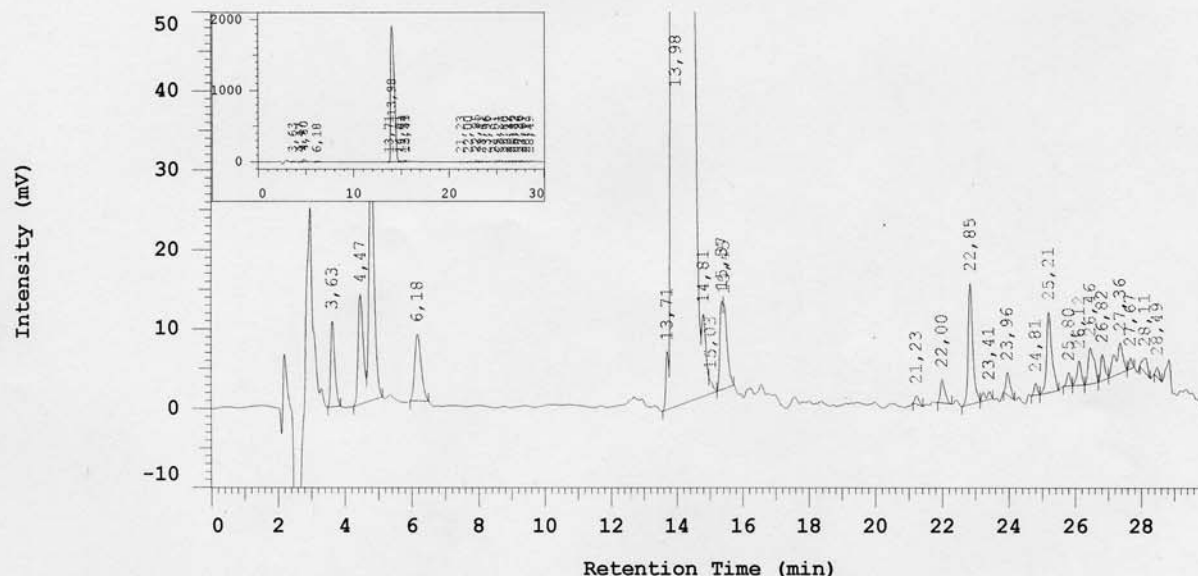

Acquisition Method: Chromni

Blank Subtr Sample Name: ACN

Column Type: 010

Solvent A: Wasser + 0,05%TFA

Developed by: Jens

Solvent B: ACN + 0,05%TFA

| No. | RT    | Area     | Conc 1 | BC |
|-----|-------|----------|--------|----|
| 1   | 3,63  | 87352    | 0,174  | MC |
| 2   | 4,47  | 142224   | 0,283  | MC |
| 3   | 4,80  | 339777   | 0,676  | MC |
| 4   | 6,18  | 109080   | 0,217  | MC |
| 5   | 13,71 | 41745    | 0,083  | MC |
| 6   | 13,98 | 48726352 | 96,925 | MC |
| 7   | 14,81 | 96191    | 0,191  | MC |
| 8   | 15,03 | 14232    | 0,028  | MC |
| 9   | 15,37 | 69070    | 0,137  | MC |
| 10  | 15,45 | 86679    | 0,172  | MC |
| 11  | 21,23 | 8884     | 0,018  | BB |
| 12  | 22,00 | 25938    | 0,052  | MC |
| 13  | 22,85 | 142957   | 0,284  | MC |
| 14  | 23,41 | 13492    | 0,027  | MC |
| 15  | 23,96 | 24950    | 0,050  | MC |
| 16  | 24,81 | 9789     | 0,019  | BB |
| 17  | 25,21 | 110721   | 0,220  | BB |
| 18  | 25,80 | 11876    | 0,024  | BB |
| 19  | 26,12 | 27383    | 0,054  | BB |
| 20  | 26,46 | 55600    | 0,111  | BB |
| 21  | 26,82 | 26983    | 0,054  | MC |
| 22  | 27,36 | 62963    | 0,125  | MC |
| 23  | 27,67 | 8544     | 0,017  | MC |
| 24  | 28,11 | 20550    | 0,041  | BB |
| 25  | 28,49 | 8726     | 0,017  | BB |

# HPLC

## Comp23b

Analyzed: 05.11.09 05:11

Reported: 19.01.10 14:20  
Processed: 19.01.10 14:20

Data Path: D:\WIN32APP\HSM\Chromni\DATA\0798\

Application: Chromni

**Sample Name: ABN519**

Injection from this vial: 1 of 1

Series:0798

Vial Number: 14

Vial Type: UNK

Volume: 5,0 ul

Chrom Type: HPLC Channel : 1

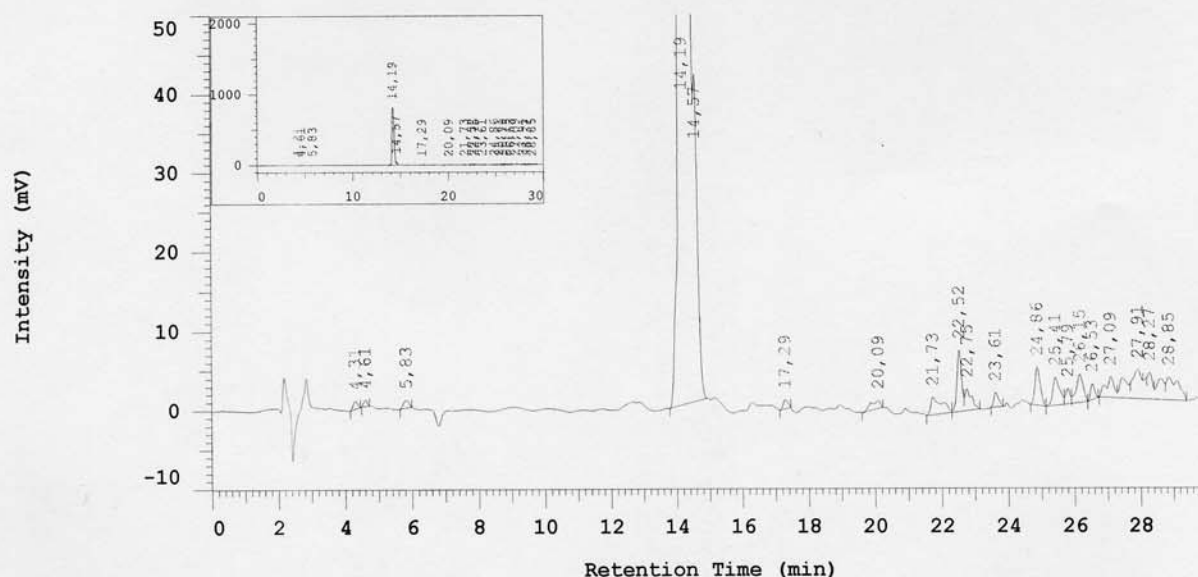

Acquisition Method: Chromni

Blank Subtr Sample Name: ACN

Column Type: 010

Developed by: Jens

Solvent A: Wasser + 0,05%TFA

Solvent B: ACN + 0,05%TFA

| No. | RT    | Area     | Conc 1  | BC |
|-----|-------|----------|---------|----|
| 1   | 4,31  | 8906     | 0,072   | MC |
| 2   | 4,61  | 5791     | 0,047   | MC |
| 3   | 5,83  | 10647    | 0,086   | MC |
| 4   | 14,19 | 11469925 | 92,255  | BV |
| 5   | 14,57 | 316480   | 2,546   | MC |
| 6   | 17,29 | 11049    | 0,089   | BB |
| 7   | 20,09 | 20416    | 0,164   | MC |
| 8   | 21,73 | 51329    | 0,413   | MC |
| 9   | 22,52 | 73468    | 0,591   | MC |
| 10  | 22,75 | 36263    | 0,292   | MC |
| 11  | 23,61 | 17599    | 0,142   | MC |
| 12  | 24,86 | 52963    | 0,426   | BB |
| 13  | 25,41 | 50524    | 0,406   | BB |
| 14  | 25,79 | 17994    | 0,145   | BB |
| 15  | 26,15 | 51629    | 0,415   | BB |
| 16  | 26,53 | 16578    | 0,133   | BB |
| 17  | 27,09 | 45070    | 0,363   | MC |
| 18  | 27,91 | 65651    | 0,528   | MC |
| 19  | 28,27 | 37302    | 0,300   | MC |
| 20  | 28,85 | 73248    | 0,589   | MC |
|     |       | 12432832 | 100,000 |    |

Peak rejection level: 0

# HPLC

## Comp23c

Analyzed: 30.07.09 13:39

Reported: 31.07.09 13:06  
Processed: 31.07.09 13:06

Data Path: D:\WIN32APP\HSM\Chromni\DATA\0465\

Application: Chromni

**Sample Name: ABN 457**

Injection from this vial: 1 of 1

Series:0465

Vial Number: 19

Vial Type: UNK

Volume: 5,0 ul

Chrom Type: HPLC Channel : 1

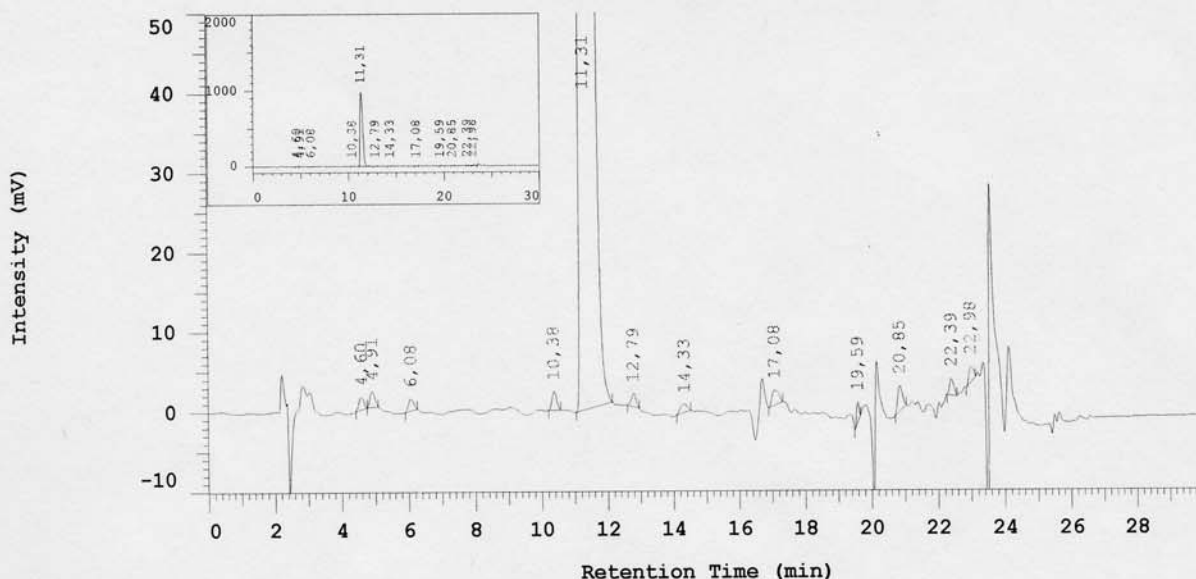

Acquisition Method: Chromni MeOH

Blank Subtr Sample Name: MeOH

Column Type: 010

Solvent A: Wasser + 0,05%TFA

Developed by: Christian

Solvent C: MeOH +0,05% TFA

| No. | RT    | Area     | Conc 1  | BC |
|-----|-------|----------|---------|----|
| 1   | 4,60  | 15405    | 0,087   | MC |
| 2   | 4,91  | 18773    | 0,106   | MC |
| 3   | 6,08  | 16004    | 0,090   | MC |
| 4   | 10,38 | 22703    | 0,128   | BB |
| 5   | 11,31 | 17555120 | 98,830  | MC |
| 6   | 12,79 | 16406    | 0,092   | MC |
| 7   | 14,33 | 14991    | 0,084   | MC |
| 8   | 17,08 | 25453    | 0,143   | MC |
| 9   | 19,59 | 11997    | 0,068   | MC |
| 10  | 20,85 | 30803    | 0,173   | MC |
| 11  | 22,39 | 17404    | 0,098   | MC |
| 12  | 22,98 | 17939    | 0,101   | BB |
|     |       | 17762998 | 100,000 |    |

Peak rejection level: 0

# HPLC

## Comp23d

Analyzed: 06.01.10 21:31

Reported: 07.01.10 15:59  
Processed: 07.01.10 15:59

Data Path: D:\WIN32APP\HSM\Chromni\DATA\0980\  
Application: Chromni

**Sample Name: ABN 541**

Injection from this vial: 1 of 1

Series:0980  
Vial Number: 5  
Vial Type: UNK  
Volume: 5,0 ul

Chrom Type: HPLC Channel : 1

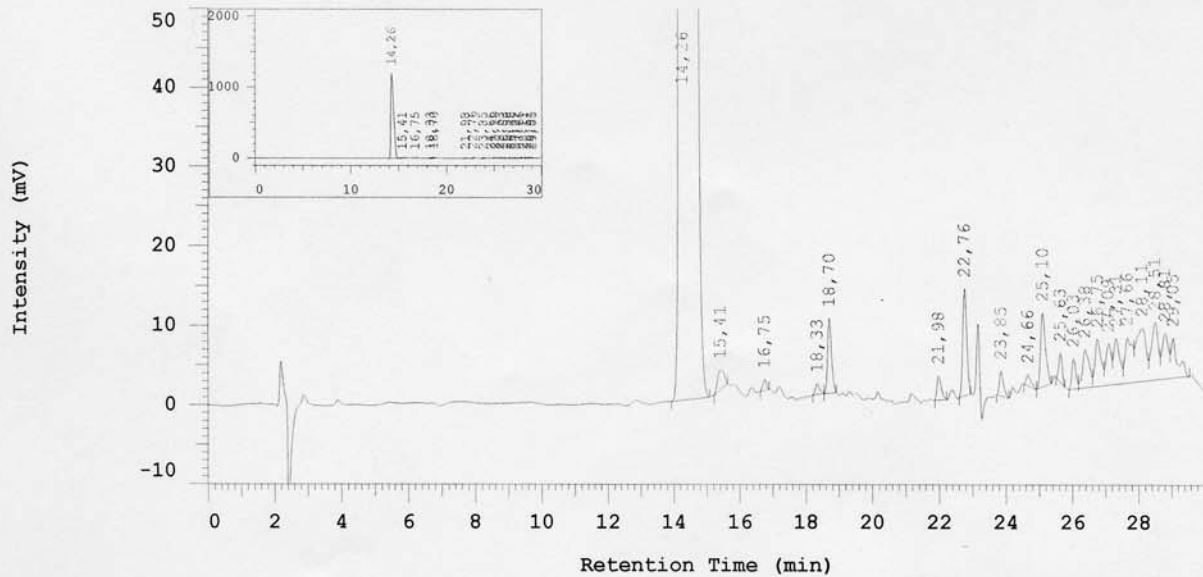

Acquisition Method: Chromni

Blank Subtr Sample Name: ACN

Column Type: 010

Solvent A: Wasser + 0,05%TFA

Developed by: Jens

Solvent B: ACN + 0,05%TFA

| No. | RT    | Area     | Conc 1  | BC |
|-----|-------|----------|---------|----|
| 1   | 14,26 | 23241756 | 95,009  | BB |
| 2   | 15,41 | 33756    | 0,138   | MC |
| 3   | 16,75 | 9547     | 0,039   | MC |
| 4   | 18,33 | 11717    | 0,048   | MC |
| 5   | 18,70 | 76424    | 0,312   | MC |
| 6   | 21,98 | 26131    | 0,107   | MC |
| 7   | 22,76 | 112169   | 0,459   | MC |
| 8   | 23,85 | 26378    | 0,108   | BB |
| 9   | 24,66 | 13849    | 0,057   | MC |
| 10  | 25,10 | 95351    | 0,390   | BB |
| 11  | 25,63 | 25989    | 0,106   | BB |
| 12  | 26,03 | 30968    | 0,127   | BB |
| 13  | 26,38 | 66613    | 0,272   | BV |
| 14  | 26,75 | 75440    | 0,308   | VV |
| 15  | 27,09 | 60007    | 0,245   | VV |
| 16  | 27,31 | 73553    | 0,301   | VV |
| 17  | 27,66 | 89229    | 0,365   | VV |
| 18  | 28,11 | 140620   | 0,575   | VV |
| 19  | 28,51 | 105010   | 0,429   | VV |
| 20  | 28,81 | 77496    | 0,317   | VV |
| 21  | 29,05 | 70714    | 0,289   | VB |
|     |       | 24462717 | 100,000 |    |

Peak rejection level: 0
